# Supplementary material for: Aire-dependent genes undergo Clp1-mediated 3’UTR shortening associated with higher transcript stability in the thymus
Source: eLife journal article supplement (doi:10.7554/elife.52985), 2020-04-27
Supplement: fig1-data2 [file Figure 1–source data 2.docx]

**Figure 1–source data 2. Annotation files in mice and humans for RNA-seq differential gene expression.**

UCSCmm9.gtf

UCSChg19.gtf

These two annotation files are GTF files to be used with intersectBed and coverageBed for RNA-seq differential gene expression analyses
