# Supplementary material for: Aire-dependent genes undergo Clp1-mediated 3’UTR shortening associated with higher transcript stability in the thymus
Source: eLife journal article supplement (doi:10.7554/elife.52985), 2020-04-27
Supplement: fig3-data1 [file Figure 3–source data 1.docx]

**Figure 3–source data 1. Human Gene ST1.0 microarray probeset and individual probe expression extraction.**

HuGene-1_0-st-v1,r3.cdf the Chip Description File

probeset.csv the list of probeset IDs corresponding to the genes on the array

HuGeneST1features.csv the list of probeset IDs and their individual probe IDs

We use the aroma.affymetrix R-package and the commands listed in aroma.affymetrix.commands.docx for “probeset expression extraction” and “individual probe expression extraction”. A mandatory folder organization associated with this package is needed for the analysis. The sample CEL files must be added in a dedicated folder.
