# Supplementary material for: Aire-dependent genes undergo Clp1-mediated 3’UTR shortening associated with higher transcript stability in the thymus
Source: eLife journal article supplement (doi:10.7554/elife.52985), 2020-04-27
Supplement: fig3-data2 [file Figure 3–source data 2.docx]

**Figure 3–source data 2. Microarray individual probe d3’UTR mapping and d3’UTR ratio calculation.**

- R-script to perform individual probe d3’UTR mapping and d3’UTR ratio calculation:

Microarray_d3UTR_hg19.R

Dependent files:

- annotation file including 3d’UTR features for microarray analysis (**Figure 1-source data 1**):

features_hg19_UTR_d.csv

- Individual probe location on hg19:

HuGene-1_0-st-v1.hg19.probe.csv

- Individual probe expression obtained from the comparison: CTR versus CLP1 sh2 KD samples (**Figure 3-source data 1**):

ST1features_CTR_v_CLP1_SH2.csv

Result file:

global_HuGene_CTR_v_CLP1_SH2.csv

In the result file, the feat_WTnorm and feat_KOnorm columns correspond, for the 3UTRd features, to the d3’UTR ratios in WT and KO samples, respectively.
