# Supplementary material for: Aire-dependent genes undergo Clp1-mediated 3’UTR shortening associated with higher transcript stability in the thymus
Source: eLife journal article supplement (doi:10.7554/elife.52985), 2020-04-27
Supplement: fig3-data3 [file Figure 3–source data 3.docx]

**Figure 3–source data 3. d3’UTR ratio imbalance obtained from microarray data.**

Microarray_d3UTR_significance.R: R-script used to perform the analysis

global_HuGene_CTR_v_CLP1_SH2_3dUTR.csv: This file corresponds to: global_HuGene_CTR_v_CLP1_SH2.csv that was obtained from **Figure 3-source data 2** and restricted to the d3’UTR features.
