# Supplementary material for: Aire-dependent genes undergo Clp1-mediated 3’UTR shortening associated with higher transcript stability in the thymus
Source: eLife. 2020 Apr 29;9:e52985. doi: 10.7554/eLife.52985 (PMC7205469; doi:10.7554/eLife.52985)
Supplement: Figure 1—source data 4. — na is for genes for which d3'UTR ratios could not be calculated due to the absence of reads mapping to regions upstream of proximal pAs in last exons. [file elife-52985-fig1-data4.xlsx]

## Sheet: Sheet4
Figure 1–source data 4: List of Aire-sensitive genes with proximal pAs in mTEChi
Refseq	Gene symbol	Expression (RPKM)		d3'UTR ratio		length (bp)
		WT	KO	WT	KO	long 3'UTR	short 3'UTR
NM_001001488	Atp8b1	1.87098	0.370861	0.284974	0.102419	2361	2214
NM_001001979	Megf10	0.190914	0.0251086	0	0	3412	3346
NM_001001985	Nat8l	0.721336	0.115621	0.488622	0.801219	4769	791
NM_001001999	Gp1bb	0.485431	na	0.475232	na	403	252
NM_001002005	Panx2	0.0566722	na	0	na	1030	578
NM_001002897	Atg9b	5.87756	1.1246	0.187245	0.218238	891	709
NM_001003815	Epb41l1	7.82541	1.03063	0.344714	0.452085	3396	484
NM_001004148	Slc13a5	0.100099	na	3.46237	na	1511	129
NM_001004761	Gpr158	0.254572	0.0194887	0.407452	0.853102	2849	834
NM_001005863	Mtus1	3.78571	0.863432	0.386982	0.562056	2508	368
NM_001005864	Mtus1	3.78571	0.863432	0.386982	0.562056	2508	368
NM_001005865	Mtus1	3.78571	0.863432	0.386982	0.562056	2508	368
NM_001006664	Epb41l1	7.82541	1.03063	0.344714	0.452085	3396	484
NM_001008231	Daam2	1.64977	0.260102	1.85545	1.98236	2504	100
NM_001008424	Cdsn	15.7839	1.02241	0.0245218	0.121359	919	649
NM_001008702	Dab2	1.21428	0.0364936	0.0798353	0	1928	850
NM_001010941	Gpr12	0.211157	na	0	na	956	356
NM_001012306	Hsd3b3	0.289792	0.0142923	0	0	408	360
NM_001013773	Nxpe5	0.393055	na	0	na	231	176
NM_001024539	Shc2	0.607579	0.129849	0.659425	0.439617	2162	597
NM_001024672	Methig1	1.53682	na	0.974522	na	644	173
NM_001024707	Lrp3	0.680154	0.0171011	0.733004	6.02955	1148	65
NM_001025372	Adcyap1r1	2.17913	0.090789	0.701683	1.15107	4284	918
NM_001025565	Lhx9	0.0489249	0.0235261	0	0	3468	655
NM_001025567	Dmbx1	0.488639	na	1.64237	na	2832	347
NM_001025575	Cfhr2	2.04909	0.328443	0	0	531	364
NM_001033149	Ttc9	4.62091	0.442392	0.467181	0.191553	1346	753
NM_001033239	Csta1	10.8747	2.09736	0.00934941	0.00717242	2298	71
NM_001033266	Gm525	1.58611	0.153499	0	0	179	155
NM_001033286	Slc30a10	2.48227	0.102785	0.502694	0.253421	4206	1205
NM_001033347	D430041d05rik	0.396749	na	0.463914	na	5706	596
NM_001033366	Dpcr1	0.76763	na	0.752362	na	1078	505
NM_001033374	Gm694	0.300844	0.0304556	1.2318	0	357	122
NM_001033397	Krt26	0.271646	0.092205	0	0	1150	938
NM_001033424	Fnd3c2	0.177727	na	0	na	453	46
NM_001033445	Garem1	2.66751	0.437628	0.440559	0.893347	1783	212
NM_001033872	Smagp	12.3547	1.69019	0	0	508	485
NM_001034874	Shisa6	1.0732	0.114873	1.23959	0.752315	5747	4261
NM_001037719	Btla	0.563273	0.0991368	0.781009	0.406443	2298	1328
NM_001037905	Dab2	1.21428	0.0364936	0.0798353	0	1928	850
NM_001037987	Edil3	0.461868	0.0642904	0	0	3405	2716
NM_001038604	Clec5a	0.732765	0.0361393	0.66577	0	3068	194
NM_001038613	Olfm1	4.72007	0.424499	0	0	1008	956
NM_001039000	Kif5a	0.816062	0.137488	0.712985	0.294925	2727	1350
NM_001039347	Kcnd3	0.180317	0.0256911	2.06377	5.09873	4793	2406
NM_001039364	Mobp	0.225223	na	0.156103	na	2901	424
NM_001039365	Mobp	0.259067	na	0	na	847	130
NM_001039555	Cyp2c68	0.799343	0.0539471	0.722874	0	233	22
NM_001039653	Lhx3	1.93525	0.119306	0.504181	0.704348	881	283
NM_001039657	Mtl5	0.640895	0.0241711	0.0669371	1.13793	675	269
NM_001039676	Slc39a2	3.92951	0.619016	0.0328328	0.0668148	1214	269
NM_001040689	Rspo4	1.24967	0.0500765	0.200285	0	1537	354
NM_001040692	Slc6a18	1.01337	na	0.641997	na	2372	83
NM_001043317	Cd22	0.677918	na	0.0605951	na	1127	703
NM_001043354	Rorb	0.184799	na	0.518332	na	1312	221
NM_001077353	Gsta3	17.2521	1.69473	0.0290108	0	597	249
NM_001077595	Shroom3	6.3459	1.27109	0.0279433	0.0596293	1035	593
NM_001077596	Shroom3	6.3459	1.27109	0.0279433	0.0596293	1035	593
NM_001080979	Tead4	0.353053	0.0377265	1.30323	0.995197	1223	182
NM_001081074	A1cf	0.44198	0.0944581	1.90229	0.360434	1896	912
NM_001081076	Gucy2g	0.673988	na	0.129211	na	586	386
NM_001081124	Map7d2	0.754969	0.0169841	0.0712042	0	1364	1040
NM_001081146	Prickle2	1.20538	0.185718	0.67231	0.631734	5054	57
NM_001081178	Adgrf5	1.42598	0.391826	0.0826087	0.0321256	4222	1117
NM_001081180	Spink5	55.4213	10.5403	0.704356	0.634516	1646	276
NM_001081186	Tmem52b	0.196393	0.0143905	0.0844626	0	1832	1307
NM_001081206	Dgki	4.86162	0.569194	0.504001	0.414001	1354	501
NM_001081227	Stum	0.856817	0.0810512	0.250301	0.405996	5956	1205
NM_001081369	Ccdc153	2.17716	0.465294	0.0111732	0.0335196	421	63
NM_001081389	Nlrp6	5.53241	0.851599	0.470475	0.586058	1018	660
NM_001081391	Csmd3	0.0392502	na	0	na	1813	1615
NM_001081414	Grm5	0.145904	0.00701595	0	0	4194	3886
NM_001081493	Cartpt	5.6744	0.101059	0.0762595	0	435	113
NM_001081567	Mapk10	0.344717	0.0697941	0.0457252	0	5237	817
NM_001081977	Rnf144a	0.258307	0.047318	1.56184	1.16241	3860	104
NM_001082483	Efr3b	1.06335	0.279638	0.944581	0.822466	3888	2310
NM_001082553	Rab27b	6.59868	0.842244	0.0492359	0.14488	6057	1527
NM_001083322	Klrk1	0.0356181	na	1.98496	na	2465	371
NM_001083342	Ptchd2	0.584908	na	0.169467	na	4399	709
NM_001083806	Gria2	0.0088615	na	0	na	3779	3682
NM_001083895	Srpx2	4.74119	0.538298	0.0895298	0	984	348
NM_001083902	Slc12a8	1.36357	0.0233133	0.0348998	0.327186	1048	316
NM_001102400	Dab2	1.21428	0.0364936	0.0798353	0	1928	850
NM_001103156	Steap2	0.411327	0.0453715	0.012279	0.107057	8578	1681
NM_001103157	Steap2	0.411327	0.0453715	0.012279	0.107057	8578	1681
NM_001105245	Pcdh19	1.48448	0.213173	0.255063	0.379601	5127	4989
NM_001105246	Pcdh19	1.48448	0.213173	0.255063	0.379601	5127	4989
NM_001105252	Tmc5	9.45424	0.611893	0.478782	0.824859	422	245
NM_001109043	Zfp185	2.33335	0.22152	0	0	1871	1840
NM_001110146	Prg4	8.22482	1.68023	0.324177	1.69082	572	118
NM_001111051	Dclk1	8.89795	1.72968	1.03581	0.858187	5334	19
NM_001111052	Dclk1	8.89795	1.72968	1.03581	0.858187	5441	126
NM_001111059	Cd34	5.76139	1.18254	1.30953	1.7723	1498	443
NM_001111274	Igf1	95.7158	10.7356	0.0808996	0.122733	6347	194
NM_001111275	Igf1	95.7158	10.7356	0.0808996	0.122733	6313	160
NM_001111276	Igf1	95.7158	10.7356	0.0808996	0.122733	6313	160
NM_001111286	Omt2a	5.42127	na	0	na	276	240
NM_001111316	Ptprc	1.78655	0.57888	0.0174715	0	1645	1087
NM_001112697	Chrm1	0.263898	0.0480156	0.0408922	0.0360241	4287	1059
NM_001113181	Gria4	0.0778948	0.00998842	0	0	557	526
NM_001113330	Crx	0.748115	na	0.499409	na	1833	551
NM_001113368	Ceacam2	3.39963	0.467782	0.919886	1.01609	2024	1002
NM_001113369	Ceacam2	3.39963	0.467782	0.919886	1.01609	2024	1002
NM_001113404	Tshr	0.277345	0.0355639	0.465185	0	516	111
NM_001113548	Adamtsl5	2.11786	0.119492	0.543436	0	439	212
NM_001114332	Slc16a10	1.90627	0.514611	0.37627	0.274724	3637	201
NM_001114333	Grm1	0.346537	na	0.398752	na	3844	1071
NM_001126331	Trp73	1.02504	0.304556	0.605957	0.270536	2742	709
NM_001128086	Anks1b	0.247165	na	0	na	3070	1545
NM_001130513	Ace2	3.53556	0.143167	0.739303	1.18182	818	125
NM_001134459	Prickle2	1.20538	0.185718	0.67231	0.631734	5054	57
NM_001134460	Prickle2	1.20538	0.185718	0.67231	0.631734	5054	57
NM_001134461	Prickle2	1.20538	0.185718	0.67231	0.631734	5054	57
NM_001136087	Slc6a18	1.01337	na	0.641997	na	2372	83
NM_001142965	Frrs1l	0.131413	0.0129623	0.661674	0	2852	1550
NM_001143834	Grm5	0.145904	0.00701595	0	0	4194	3886
NM_001144992	2810459m11rik	0.240653	0.00321446	0.187987	0	2367	1597
NM_001144993	2810459m11rik	0.240653	0.00321446	0.187987	0	2367	1597
NM_001145192	Akain1	0.351565	0.0380201	0	0	1886	1862
NM_001145813	Elf5	3.90172	0.220139	0.473277	1.12875	1328	182
NM_001145830	Plcb1	1.35602	0.0901607	0.238877	0.926678	2978	639
NM_001145953	Lgals3	32.3464	4.37683	0.0043659	0.0103435	487	117
NM_001146001	Pdzk1	4.28254	0.751628	0.879845	1.26269	763	310
NM_001146200	Pik3cg	7.84507	1.69221	0.388089	0.411629	3181	1153
NM_001146201	Pik3cg	7.84507	1.69221	0.388089	0.411629	3181	1153
NM_001150749	Rdh7	8.28451	0.398823	0.741165	1.6129	524	90
NM_001159299	Itih4	3.86138	0.0526748	0.0164622	0	279	142
NM_001159415	Ces3b	0.364305	0.0222451	0	0	329	306
NM_001159555	Cd36	2.57853	0.0623858	0.412763	1.57124	1660	179
NM_001159556	Cd36	2.57853	0.0623858	0.412763	1.57124	1660	179
NM_001159557	Cd36	2.57853	0.0623858	0.412763	1.57124	1660	179
NM_001159558	Cd36	2.57853	0.0623858	0.412763	1.57124	1660	179
NM_001159638	Them7	0.585581	0.0288803	0	0	852	781
NM_001159706	Folh1	0.579405	na	0.677759	na	683	306
NM_001159934	Oas1h	7.89737	0.0849205	0.0350072	0	559	496
NM_001160096	Cldn10	2.73009	0.42098	0.0389009	0	210	128
NM_001160097	Cldn10	2.73009	0.42098	0.0389009	0	210	128
NM_001160098	Cldn10	2.73009	0.42098	0.0389009	0	210	128
NM_001160099	Cldn10	2.73009	0.42098	0.0389009	0	210	128
NM_001160139	Kcnq5	0.242075	0.054322	0.668232	0.59468	3760	476
NM_001160211	Cnih3	0.0383078	na	3.09297	na	1389	654
NM_001160212	Cnih3	0.0383078	na	3.09297	na	1389	654
NM_001160268	Plekha6	12.6768	2.79006	0.48764	0.447927	3727	1511
NM_001160368	Rnf152	0.692868	0.0689324	0.663881	0.85316	7302	846
NM_001161714	Tgm1	12.9196	3.4632	0	0	194	169
NM_001161715	Tgm1	12.9196	3.4632	0	0	194	169
NM_001161742	Hsd3b3	0.289792	0.0142923	0	0	408	360
NM_001161743	Hsd3b3	0.289792	0.0142923	0	0	408	360
NM_001161744	Hsd3b3	0.289792	0.0142923	0	0	408	360
NM_001161745	Hsd3b3	0.289792	0.0142923	0	0	408	360
NM_001161796	Gucy1b3	1.75583	0.289349	0	0	1267	1224
NM_001162368	Mgat4c	0.638807	na	0.329026	na	2105	862
NM_001162369	Mgat4c	0.638807	na	0.329026	na	2105	862
NM_001162500	Parvg	1.71567	0.222784	0	0	1530	1494
NM_001162846	Phyhipl	0.616541	0.240882	0.438444	0.233351	1561	369
NM_001163028	Bco1	1.5634	0.156621	0.955577	0.745816	747	508
NM_001163032	Synpr	1.99518	0.167875	0	0	1488	1405
NM_001163155	Col4a5	1.91399	0.439728	0.88609	0.549513	1111	464
NM_001163328	Ralyl	0.102018	na	0	na	1232	921
NM_001163329	Ralyl	0.102018	na	0	na	1232	921
NM_001163330	Ralyl	0.102018	na	0	na	1227	916
NM_001163504	Nr1h4	0.867173	0.070977	0	0	476	233
NM_001163516	Pex5l	1.43186	0.164775	0	0	1038	981
NM_001163517	Pex5l	1.43186	0.164775	0	0	1038	981
NM_001163554	Pou2f2	0.0776171	na	1.69103	na	1562	235
NM_001163555	Pou2f2	0.0776171	na	1.69103	na	1848	521
NM_001163556	Pou2f2	0.0776171	na	1.69103	na	1848	521
NM_001163566	Crb2	0.156483	0.0218106	4.63768	0	2431	2335
NM_001163633	Wnt7b	4.89786	0.310196	1.24317	2.16222	1952	978
NM_001163634	Wnt7b	4.89786	0.310196	1.24317	2.16222	1952	978
NM_001163640	Chn2	6.24835	0.801223	0.430896	0.514502	1568	51
NM_001163700	Nr1h4	0.867173	0.070977	0	0	476	233
NM_001163815	Vav1	20.1279	5.50957	0.0326857	0.0489347	1532	248
NM_001163816	Vav1	20.1279	5.50957	0.0326857	0.0489347	1532	248
NM_001164155	Tnfrsf19	1.42641	0.192535	1.79809	1.72893	2623	107
NM_001164186	Barhl1	0.266123	na	0	na	1948	654
NM_001164210	Sptssb	14.6492	0.737447	0.190233	0.207673	1333	458
NM_001164369	Bcas1	1.84876	0.405507	0.986372	0.942327	1083	104
NM_001164401	Ptpro	0.441742	0.134868	0	0	2537	1121
NM_001164402	Ptpro	0.441742	0.134868	0	0	2537	1121
NM_001164403	Ptpro	0.441742	0.134868	0	0	2537	1121
NM_001164491	Ablim3	1.86395	0.156731	0.734153	1.35832	1902	171
NM_001164523	Omt2a	5.42127	na	0	na	276	240
NM_001164557	Pdzk1ip1	88.8191	7.47356	0	0	346	314
NM_001164558	Pdzk1ip1	88.8191	7.47356	0	0	346	314
NM_001164567	Vill	2.43661	na	0.0538805	na	278	79
NM_001164634	Slc22a8	0.319909	na	0.283319	na	1558	405
NM_001164635	Slc22a8	0.319909	na	0.283319	na	1558	405
NM_001164696	Klk6	37.0481	1.0084	0.0107737	0	380	140
NM_001164697	Klk6	37.0481	1.0084	0.0107737	0	380	140
NM_001164698	Klk6	37.0481	1.0084	0.0107737	0	380	140
NM_001164742	Serpina1f	0.0311023	na	0	na	1688	91
NM_001164763	Rarres1	30.8009	3.5925	0.0266108	0.0365698	451	366
NM_001164767	Robo3	2.93513	0.289516	0	0	343	258
NM_001166009	Tmem215	0.730612	0.146385	0.242023	0.290428	1021	627
NM_001166372	43160	0.428294	0.0483092	0.436915	2.86559	3107	1897
NM_001166375	43160	0.428294	0.0483092	0.436915	2.86559	3107	1897
NM_001166580	8430408g22rik	84.9147	14.7323	0.466694	0.460972	532	176
NM_001167578	Tcp10c	1.30287	0.417665	0.07683	0.119513	847	64
NM_001167705	Serpina3a	0.567569	na	0.697443	na	378	290
NM_001167920	Slc8a3	0.21632	na	1.08497	na	1576	871
NM_001168223	Clec2g	6.93207	1.0497	0.696272	0.745807	1620	108
NM_001168224	Clec2g	6.93207	1.0497	0.696272	0.745807	1620	108
NM_001168509	Ffar2	0.996191	0.103017	0.675454	1.12749	764	91
NM_001168510	Ffar2	0.996191	0.103017	0.675454	1.12749	764	91
NM_001168511	Ffar2	0.996191	0.103017	0.675454	1.12749	764	91
NM_001168512	Ffar2	0.996191	0.103017	0.675454	1.12749	764	91
NM_001168564	Kcns3	0.747599	0.162627	0	0	1019	481
NM_001168615	Tifab	0.391033	0.0365619	0.395766	0.328948	2482	625
NM_001168624	C2cd4c	0.087187	0.00429998	0	1.00894	5198	1337
NM_001168643	Slc6a18	1.01337	na	0.641997	na	2398	109
NM_001168644	Slc6a18	1.01337	na	0.641997	na	2398	109
NM_001168645	Slc6a18	1.01337	na	0.641997	na	2398	109
NM_001168646	Slc6a18	1.01337	na	0.641997	na	2372	83
NM_001168679	Tspan8	56.5426	5.92995	0.0517104	0.0441897	497	220
NM_001168680	Tspan8	56.5426	5.92995	0.0517104	0.0441897	497	220
NM_001170855	Trim36	1.25235	0.172941	0.351832	0.496457	2113	97
NM_001170866	Ncald	0.664139	0.0419814	1.53462	3.8	2653	833
NM_001170867	Ncald	0.664139	0.0419814	1.53462	3.8	2653	833
NM_001170868	Ncald	0.664139	0.0419814	1.53462	3.8	2653	833
NM_001170912	Trim66	1.82274	0.0216416	1.3555	21.7161	4974	198
NM_001170913	Trim66	1.82274	0.0216416	1.3555	21.7161	5026	250
NM_001170978	Abat	2.35655	0.287541	1.11513	1.12908	2941	946
NM_001171187	Mal	10.2778	0.75453	0.888983	0.580212	1754	147
NM_001172091	1700001c19rik	0.17143	na	0.622358	na	828	175
NM_001174054	Camk2b	12.8004	2.92526	1.2935	1.4839	2161	247
NM_001177349	Ifi213	0.412243	na	0.144857	na	1957	207
NM_001177350	Ifi213	0.412243	na	0.144857	na	1957	207
NM_001177396	Anks1b	0.247165	na	0	na	3070	1545
NM_001177397	Anks1b	0.131001	0.0025072	0	0	5943	4418
NM_001177398	Anks1b	0.247165	na	0	na	3070	1545
NM_001177438	Aldh3b2	35.0929	4.97937	0.0116781	0.0395764	473	388
NM_001177503	Plekhd1	0.14809	0.0122513	0	0	1731	1656
NM_001177616	Arpp21	0.353361	0.160782	0	0	674	506
NM_001177618	Arpp21	0.353361	0.160782	0	0	674	506
NM_001177696	Ablim2	3.19779	0.690252	0.241509	0.151022	1560	703
NM_001177697	Ablim2	3.19779	0.690252	0.241509	0.151022	1560	703
NM_001177698	Ablim2	3.19779	0.690252	0.241509	0.151022	1560	703
NM_001177699	Ablim2	3.19779	0.690252	0.241509	0.151022	1560	703
NM_001177700	Ablim2	3.19779	0.690252	0.241509	0.151022	1560	703
NM_001177713	Cyp26b1	0.510023	0.040875	2.5849	2.66485	2853	290
NM_001177772	Slco1c1	1.0705	na	0	na	649	78
NM_001177810	Rapgef3	0.622918	0.117465	0	0	778	594
NM_001177811	Rapgef3	0.622918	0.117465	0	0	778	594
NM_001177900	Rd3	14.0979	1.13756	0.0277372	0.230767	2979	1086
NM_001177977	Acsm2	3.06321	0.405779	0.161841	0.295842	4685	592
NM_001177978	Acsm2	3.06321	0.405779	0.161841	0.295842	4685	592
NM_001190187	Nrg3	0.0590262	na	0	na	1582	1410
NM_001190188	Nrg3	0.0590262	na	0	na	1582	1410
NM_001190330	Ces2a	24.6745	3.14968	0.148607	0.0311005	218	47
NM_001190448	Ddc	10.7769	2.76384	0.75994	0.945626	417	182
NM_001190703	Dlk1	12.1059	0.0995084	0.00079518	0	2976	262
NM_001190704	Dlk1	12.066	0.09834	0.000797809	0	2976	262
NM_001190705	Dlk1	11.8631	0.125799	0.000811455	0	2976	262
NM_001190885	Kcnip1	1.13684	na	0	na	1210	764
NM_001190886	Kcnip1	1.13684	na	0	na	1210	764
NM_001195006	Ndrg4	2.42641	0.316356	0	0	1787	1557
NM_001195538	Dclk1	8.89795	1.72968	1.03581	0.858187	5334	19
NM_001195539	Dclk1	8.89795	1.72968	1.03581	0.858187	5334	19
NM_001198785	Aatk	0.558011	0.0821107	0.535082	0.388571	1086	911
NM_001198787	Aatk	0.558011	0.0821107	0.535082	0.388571	1086	911
NM_001199015	Slc7a9	2.06122	0.0991158	0	0	139	104
NM_001199016	Slc7a9	2.06122	0.0991158	0	0	139	104
NM_001199301	Cacng5	0.927596	0.276123	0.85349	0.493199	2747	1845
NM_001204129	C1qtnf1	6.87248	0.969829	0.584361	0.894626	3431	445
NM_001204130	C1qtnf1	6.87248	0.969829	0.584361	0.894626	3431	445
NM_001204134	C1qtnf3	2.27821	0.0659657	0.380603	0.732839	1487	1025
NM_001204201	Spp1	61.6244	5.45253	0.172941	0.272118	435	292
NM_001204202	Spp1	61.6244	5.45253	0.172941	0.272118	435	292
NM_001204203	Spp1	61.6244	5.45253	0.172941	0.272118	435	292
NM_001204233	Spp1	61.6244	5.45253	0.172941	0.272118	435	292
NM_001204239	Clec1b	0.537096	na	0	na	162	82
NM_001204253	Clec1b	0.391106	na	0	na	307	227
NM_001204333	Cyp4f14	3.02841	0.0100604	0	0	431	377
NM_001204334	Cyp4f14	3.02841	0.0100604	0	0	431	377
NM_001204335	Cyp4f14	3.02841	0.0100604	0	0	431	377
NM_001204336	Cyp4f14	3.02841	0.0100604	0	0	431	377
NM_001205075	Pnoc	2.22449	0.0606905	0	0	1103	282
NM_001205098	Mgat4c	0.638807	na	0.329026	na	2105	862
NM_007377	Aatk	0.558011	0.0821107	0.535082	0.388571	1086	911
NM_007407	Adcyap1r1	2.17913	0.090789	0.701683	1.15107	4284	918
NM_007413	Adora2b	3.39869	0.756546	0.276405	0.301236	727	384
NM_007423	Afp	1.52626	na	0	na	191	139
NM_007428	Agt	16.1085	1.04893	0.371858	0.450631	343	154
NM_007470	Apod	57.4961	8.19735	0.0128664	0.0102537	1149	219
NM_007473	Aqp7	3.69953	0.629721	0.41615	0.435417	1172	52
NM_007519	Baat	2.58149	0.478588	0.497374	0	402	246
NM_007543	Ceacam2	3.30536	0.454811	0.946121	1.04507	2144	1122
NM_007576	C4bp	14.0337	0.337857	0.301151	0	285	149
NM_007592	Car8	29.6865	3.95698	0.125937	0.112374	4724	417
NM_007595	Camk2b	12.8004	2.92526	1.2935	1.4839	2161	247
NM_007602	Capn5	14.4555	2.70673	0.838886	0.879431	2308	211
NM_007643	Cd36	2.57853	0.0623858	0.412763	1.57124	1660	179
NM_007646	Cd38	0.782416	0.0218106	0.762607	5.56824	2031	192
NM_007655	Cd79a	2.9707	0.287004	0.017295	0	653	314
NM_007676	Psg16	0.573623	0.0222895	0.134056	0	670	217
NM_007698	Chrm1	0.263898	0.0480156	0.0408922	0.0360241	4287	1059
NM_007702	Cidea	4.05364	0.871087	0	0	271	249
NM_007703	Elovl3	3.33224	0.371038	0.162074	0.116654	892	505
NM_007722	Ackr3	1.5048	0.395891	0.0410442	0.100026	1379	815
NM_007729	Col11a1	0.37058	na	0.345871	na	1499	276
NM_007735	Col4a4	1.26235	0.08196	0.40867	0.352315	2408	281
NM_007736	Col4a5	1.91399	0.439728	0.88609	0.549513	1111	464
NM_007740	Col9a1	3.45657	0.480171	0	0	877	722
NM_007756	Cplx1	3.4712	0.360016	0.812641	0.236008	1575	655
NM_007770	Crx	0.748115	na	0.499409	na	1833	551
NM_007789	Ncan	0.527319	0.0479381	0.859406	0.404072	3235	2082
NM_007818	Cyp3a11	2.31644	0.0939987	0.682225	1.83475	460	201
NM_007819	Cyp3a13	18.5031	3.71771	0.227796	0.166065	1336	305
NM_007823	Cyp4b1	0.671291	0.0232647	0	0	317	296
NM_007824	Cyp7a1	0.0282061	na	0	na	2600	2173
NM_007843	Defb1	53.8755	10.7648	0.430431	0.290144	609	87
NM_007876	Dpep1	1.72087	0.300909	0.0516388	1.00983	754	166
NM_007878	Drd4	1.37813	0.0375995	0	0	140	94
NM_007903	Edn3	0.341746	na	0.609292	na	2124	702
NM_007934	Enpep	4.21943	0.352862	0	0	1102	663
NM_007937	Epha5	0.244047	0.0329412	0.164932	0.447672	4279	1250
NM_007972	F10	12.3038	1.65302	0.0582367	0.0320675	334	18
NM_008008	Fgf7	0.0751392	na	0.87803	na	1624	964
NM_008013	Fgl2	4.78632	0.589128	0.715879	0.625736	2426	563
NM_008082	Galr1	0.165399	0.0368854	0	0	1197	893
NM_008090	Gata2	1.28818	0.129049	0.538329	0	1538	998
NM_008096	Gc	17.2079	3.81183	0	0	178	149
NM_008100	Gcg	16.9124	1.80723	0.49001	0.685183	448	200
NM_008151	Gpr12	0.211157	na	0	na	956	356
NM_008245	Hhex	1.30993	0.15553	0	0	926	855
NM_008261	Hnf4a	2.13971	0.123469	0.63766	0.874704	2816	2299
NM_008285	Hrh1	0.698008	0.0464414	0	0	2070	1178
NM_008299	Dnajb3	1.85365	0.231713	0.375849	1.20484	218	18
NM_008308	Htr1a	0.0839113	na	0	na	2614	2574
NM_008382	Inhbe	0.152783	0.0285707	0	0	855	613
NM_008386	Ins1	4.47317	0.0415647	0	0	508	76
NM_008392	Acod1	6.26276	0.618829	0.06454	0.0761412	1065	591
NM_008409	Itm2a	4.21386	0.591802	1.17887	1.24579	696	128
NM_008424	Kcne1	1.24885	0.0320279	0.263902	0.430276	2564	133
NM_008428	Kcnj8	0.283394	0.0294645	0	0	666	236
NM_008429	Kcnj9	0.499868	na	0.316156	na	1830	783
NM_008522	Ltf	18.7923	0.0979566	0.0320666	0.127232	584	136
NM_008536	Tm4sf1	7.92516	1.25581	0.0420616	0.0212735	692	274
NM_008579	Meig1	2.83537	0.311639	0.279221	0	152	86
NM_008585	Mep1a	37.1049	8.90037	0.365521	0.501355	624	380
NM_008600	Mip	2.39487	na	1.00778	na	1307	174
NM_008605	Mmp12	0.669895	0.257701	0	0.146067	2134	354
NM_008614	Mobp	0.225223	na	0.156103	na	2901	424
NM_008713	Nos3	1.15085	0.297347	2.16925	1.62741	495	345
NM_008734	Nrg3	0.0590262	na	0	na	1582	1410
NM_008736	Nrl	6.74648	1.45817	0.00475448	0.0987253	1577	1034
NM_008759	Sebox	2.23825	na	0.069068	na	676	507
NM_008766	Slc22a6	0.18334	na	0.316843	na	2088	289
NM_008769	Otc	0.0897797	na	0.392713	na	1122	134
NM_008770	Cldn11	0.430647	0.0102262	1.57762	2.3234	1018	313
NM_008792	Pcsk2	3.30285	0.166554	0.0140375	0.0297461	2471	217
NM_008855	Prkcb	0.998275	0.202119	0.910997	0.575946	6587	1167
NM_008865	Prl3b1	1.21762	na	0	na	208	140
NM_008895	Pomc	47.4264	2.1877	0	0	150	108
NM_008938	Prph2	1.55613	0.32952	0.279247	0.569416	1379	397
NM_008984	Ptprm	0.630543	0.175439	0	0	780	678
NM_009036	Rbpjl	0.247639	na	0.321157	na	805	148
NM_009038	Rcvrn	4.64079	0.342848	0	0	362	340
NM_009040	Rdh16	0.426297	0.0234274	0.2049	0.23905	2209	1212
NM_009060	Rgn	3.24729	0.165613	1.02899	1.45529	602	185
NM_009062	Rgs4	110.976	20.136	0.775927	0.825114	2204	235
NM_009065	Rit2	0.331127	na	1.26556	na	963	298
NM_009108	Nr1h4	0.867173	0.070977	0	0	476	233
NM_009115	S100b	2.69176	0.17535	0.0711054	0	1251	1069
NM_009129	Scg2	5.3607	0.105398	0.168397	0	482	318
NM_009139	Ccl6	113.084	8.60109	0.173801	0.138743	939	429
NM_009144	Sfrp2	0.0598532	0.0383747	5.44146	1.89268	892	277
NM_009154	Sema5a	0.979284	0.18836	0.76496	1.21106	6926	1125
NM_009158	Mapk10	0.342931	0.0694324	0.0459633	0	5368	948
NM_009178	St3gal4	20.821	1.28458	0.446779	0.7162	854	678
NM_009196	Slc16a1	12.0651	1.41823	0	0	2740	1536
NM_009199	Slc1a1	2.3783	0.130377	0.462561	0.0647898	2060	738
NM_009209	Slc6a2	2.87449	0.341291	0.281031	0.153108	4018	385
NM_009216	Sstr1	0.240213	0.0321817	1.71446	0.341872	2268	1253
NM_009243	Serpina1a	0.101657	0.0869031	0.567329	0.850993	216	65
NM_009253	Serpina3m	0.454929	0.125004	0.297943	0	330	73
NM_009257	Serpinb5	14.3293	1.91308	0.228759	0.206129	1355	109
NM_009263	Spp1	61.6244	5.45253	0.172941	0.272118	435	292
NM_009307	Syt2	0.412698	na	0.302317	na	1736	1038
NM_009308	Syt4	0.762936	na	0.901833	na	2375	160
NM_009324	Tbx2	2.00022	0.128244	0.422029	0.694479	934	119
NM_009348	Tectb	2.05778	na	0.8426	na	1605	716
NM_009411	Tpbpa	0.230911	na	0	na	914	255
NM_009463	Ucp1	1.33295	na	0.129373	na	485	81
NM_009467	Ugt2b5	1.64758	0.11318	0.380571	0.394667	266	16
NM_009470	Umod	4.85399	0.659039	0.448529	1.0198	351	243
NM_009474	Uox	2.68111	0.0127332	0	0	876	802
NM_009509	Vil1	24.9575	5.94066	0.132929	0	569	527
NM_009528	Wnt7b	4.89786	0.310196	1.24317	2.16222	1952	978
NM_009549	Zfp185	2.33335	0.22152	0	0	1871	1840
NM_009598	Ace	4.38278	0.182468	0.316116	0.21733	930	226
NM_009612	Acvrl1	1.97121	0.301812	0.546385	0.577444	1859	161
NM_009626	Adh7	3.51829	na	0.421319	na	836	225
NM_009661	Alox8	11.9215	2.14668	0.119349	0.109902	1205	850
NM_009700	Aqp4	6.67944	0.30357	0.654117	1.01567	4057	236
NM_009801	Car2	16.67	1.89803	0.347378	0.136473	680	486
NM_009827	Cckar	1.63319	0.00656499	0	0	1271	1144
NM_009845	Cd22	0.677918	na	0.0605951	na	1127	703
NM_009848	Entpd1	2.46901	0.455974	0.221793	0.281567	2573	442
NM_009850	Cd3g	4.49146	0.813348	0.0221592	0.0392278	346	171
NM_009885	Cel	6.47652	0.173469	0	0	238	199
NM_009912	Ccr1	2.76911	0.224223	0.0742604	0	1298	451
NM_009922	Cnn1	5.96225	0.0526748	0	0	990	496
NM_010003	Cyp2c39	0.214306	na	0	na	335	265
NM_010007	Cyp2j5	0.174872	0.0224238	0.174024	0	2036	319
NM_010016	Cd55	8.39387	1.34543	0.967399	1.11111	1282	98
NM_010050	Dio2	0.65309	0.103207	0.339013	0.753208	4860	3208
NM_010051	Dkk1	7.29564	0.258839	0.161918	0.136097	1301	350
NM_010052	Dlk1	13.9887	0.109912	0.000688153	0	2976	262
NM_010103	Edil3	0.461868	0.0642904	0	0	3405	2716
NM_010125	Elf5	3.90172	0.220139	0.473277	1.12875	1328	182
NM_010142	Ephb2	0.774438	0.155774	1.45152	0.425445	1712	1038
NM_010157	Esr2	0.683436	na	0.620636	na	1311	654
NM_010170	F2rl2	0.272022	0.0707735	0	0	1210	1163
NM_010186	Fcgr1	0.21881	na	0.181874	na	1367	54
NM_010196	Fga	1.84115	na	0.0138507	na	1624	258
NM_010208	Fgr	7.17964	0.795617	0.409095	0.258962	1539	184
NM_010250	Gabra1	0.180449	0.025151	2.2503	0.92423	1999	798
NM_010271	Gpd1	3.11435	0.221862	1.40161	1.2241	1720	507
NM_010291	Gjb5	1.43757	0.0485102	0	0	725	335
NM_010293	Gykl1	0.0190457	na	0	na	222	179
NM_010299	Gm2a	45.8001	2.83267	1.08635	1.09813	1365	936
NM_010314	Gngt1	0.68843	na	0.285338	na	656	124
NM_010317	Gng4	7.43544	0.3755	0.413765	0.760559	2520	213
NM_010327	Gp1bb	0.504556	na	0.457219	na	403	252
NM_010338	Gpr37	1.2627	0.237734	0.176842	0	518	50
NM_010356	Gsta3	17.2521	1.69473	0.0290108	0	597	249
NM_010362	Gsto1	138.702	3.67136	0.475385	0.668498	338	65
NM_010403	Hao1	1.46063	0.0706775	0.833435	0.485407	896	245
NM_010449	Hoxa1	0.220619	0.0148894	0	0	1367	1144
NM_010474	Hs3st1	7.50793	0.335102	0.0265632	0	428	297
NM_010491	Iapp	127.931	4.70677	0.415196	0.457937	315	43
NM_010512	Igf1	95.7158	10.7356	0.0808996	0.122733	6347	194
NM_010574	Irx2	2.8979	0.0383089	0.290593	0	931	507
NM_010604	Kcnj16	6.39576	0.0637277	0.320723	1.19205	2194	1018
NM_010671	Krtap13	0.287098	0.0175307	0.83871	0	260	43
NM_010696	Lcp2	4.51792	0.766524	0.128003	0.0569079	1593	569
NM_010704	Lepr	0.159304	na	0	na	176	76
NM_010705	Lgals3	32.3464	4.37683	0.0043659	0.0103435	487	117
NM_010714	Lhx9	0.0489249	0.0235261	0	0	3468	655
NM_010733	Lrrn3	2.37417	0.376248	0	0	525	473
NM_010762	Mal	10.2778	0.75453	0.888983	0.580212	1754	147
NM_010770	Matn3	0.509643	na	0	na	1453	918
NM_010919	Nkx2-2	0.311506	na	1.16486	na	843	723
NM_010930	Nov	12.0188	0.783403	0.667167	0.56478	1256	95
NM_010932	Pnoc	2.43555	0.0262445	0	0	1189	368
NM_011082	Pigr	87.6264	7.92081	0.617504	0.682987	1353	678
NM_011109	Pla2g2d	13.8052	2.76638	0.406683	0.500614	1750	734
NM_011113	Plaur	4.27216	0.33946	0.193525	0.832824	402	244
NM_011138	Pou2f2	0.0776171	na	1.69103	na	1848	521
NM_011168	Prl7a2	0.107183	na	0	na	473	100
NM_011177	Klk6	37.0481	1.0084	0.0107737	0	380	140
NM_011210	Ptprc	1.78655	0.57888	0.0174715	0	1645	1087
NM_011212	Ptpre	0.757545	0.136477	1.63637	1.59047	2988	1316
NM_011216	Ptpro	0.441742	0.134868	0	0	2537	1121
NM_011271	Rnase1	96.4014	5.428	0.0297702	0.0175339	444	268
NM_011283	Rp1	0.0469073	na	1.15314	na	1093	449
NM_011286	Rph3a	1.42928	0.0213112	1.60155	0.170462	1668	131
NM_011333	Ccl2	41.5145	8.39115	0.280497	0.353616	274	99
NM_011338	Ccl9	172.36	22.2266	0.0532141	0.0306107	2467	719
NM_011339	Cxcl15	1.48261	0.0342548	0.156166	0.139794	1586	420
NM_011347	Selp	1.0948	0.0638117	0.895782	1.3795	1007	119
NM_011348	Sema3e	1.62708	0.206378	0.166626	0.250402	3899	1522
NM_011356	Frzb	1.33721	na	0.125847	na	1392	1185
NM_011384	Six6	0.112936	na	0.358795	na	3104	525
NM_011392	Slc34a1	0.49181	0.146125	0.360077	0.137119	1058	222
NM_011437	Sox10	2.0583	0.10041	0.122994	0	1025	853
NM_011441	Sox17	0.272358	0.00873108	1.3842	0	788	326
NM_011458	Serpina3k	0.981255	0.176943	0.397982	0.141505	318	95
NM_011459	Serpinb8	9.01198	0.940042	0.381171	0.403497	1653	284
NM_011567	Tead4	0.353053	0.0377265	1.30323	0.995197	1223	182
NM_011594	Timp2	41.9962	7.91612	0.303925	0.446824	2638	106
NM_011613	Tnfsf11	1.084	0.183143	0.376238	0.0839867	1130	767
NM_011642	Trp73	1.02504	0.304556	0.605957	0.270536	2742	709
NM_011648	Tshr	0.241192	0.0164949	0	1.0729	1925	1294
NM_011661	Tyr	0.037058	na	1	na	1644	234
NM_011674	Ugt8a	0.291064	0.0149292	2.53185	3.51645	1873	384
NM_011683	Vmn1r51	0.0987214	na	0	na	552	245
NM_011691	Vav1	20.1279	5.50957	0.0326857	0.0489347	1532	248
NM_011700	Vill	2.43661	na	0.0538805	na	278	79
NM_011702	Vip	1.45144	na	0.551724	na	813	465
NM_011704	Vnn1	8.9313	0.253797	1.19892	1.49805	689	175
NM_011731	Slc6a20b	0.854328	0.406396	0.496012	0.163724	1173	166
NM_011838	Lynx1	12.8826	0.521457	0.707897	0.689817	3375	938
NM_011889	43346	0.283837	na	1.48523	na	3569	1214
NM_011998	Chst4	0.162065	0.0122245	0	0	739	660
NM_012028	St6galnac5	0.149504	na	0	na	801	467
NM_012054	Aoah	0.158339	na	2.20401	na	915	366
NM_013462	Adrb3	0.0913493	na	0	na	753	504
NM_013464	Ahr	1.71344	0.32387	1.17427	0.516896	2710	2143
NM_013473	Anxa8	63.1907	3.62589	0.956938	0.909945	818	268
NM_013504	Dsc1	4.15639	0.523455	0.98981	1.34948	1049	306
NM_013510	Epb41l1	7.82541	1.03063	0.344714	0.452085	3396	484
NM_013515	Stom	11.2245	1.24538	0.73757	0.895625	1871	1020
NM_013526	Gdf6	0.363879	0.011763	0	0	2061	1898
NM_013532	Lilrb4a	2.15743	0.101212	0.460312	0	367	253
NM_013540	Gria2	0.0088615	na	0	na	3779	3682
NM_013542	Gzmb	5.54573	na	0.155308	na	561	470
NM_013555	Hoxd9	0.355278	na	0	na	787	763
NM_013568	Kcna6	0.314867	0.058665	1.46276	1.18136	3120	1646
NM_013569	Kcnh2	1.6055	0.228748	0	0	411	387
NM_013580	Ldhc	2.83031	0.0398823	0.0820513	2.8	265	115
NM_013601	Msx2	0.0992437	0.00795374	0.520772	3.47181	1288	277
NM_013628	Pcsk1	1.62737	0.422994	0.199429	0.163975	179	18
NM_013697	Ttr	80.8259	10.6289	0.0171139	0.0152777	588	141
NM_013701	Ugt1a2	37.9904	4.55903	0	0.00243968	1578	574
NM_013708	Nr2e3	0.622045	0.0284874	0	1.09804	616	259
NM_013723	Podxl	0.897489	0.0920677	0.951307	0.89185	3529	2713
NM_013732	Cartpt	5.6744	0.101059	0.0762595	0	435	113
NM_013806	Abcc2	1.58575	0.100003	1.39704	0.489766	661	205
NM_013823	Kl	0.612222	0.0568877	0.547101	0.290385	1963	1625
NM_013851	Abca8b	0.154135	0.0164706	0	2.34602	1104	237
NM_013869	Tnfrsf19	1.42641	0.192535	1.79809	1.72893	2623	107
NM_013874	Dpf1	0.136072	0.0249265	3.89058	2.7234	1035	377
NM_013892	Pcsk1n	1.52268	na	0.043733	na	1307	130
NM_013900	Mfi2	4.6022	0.401822	0.771297	1.05647	1798	851
NM_013905	Heyl	10.081	1.85641	0.551739	0.502352	3240	893
NM_015745	Rbp3	0.183645	na	0.413255	na	1496	578
NM_015756	Shroom3	6.3459	1.27109	0.0279433	0.0596293	1035	593
NM_015767	Ttpa	0.590988	0.016239	0	0	2204	1889
NM_015826	Dmrt1	0.206455	0.0240669	3.2974	0	978	300
NM_016672	Ddc	10.7769	2.76384	0.75994	0.945626	417	182
NM_016674	Cldn1	39.6143	9.6696	0.756599	0.738354	2392	318
NM_016751	Clec4f	7.84761	na	0	na	669	194
NM_016770	Folh1	0.579405	na	0.677759	na	683	306
NM_016771	Sult1d1	3.85715	0.378307	0.475521	0.636386	1287	684
NM_016867	Gipc2	53.3248	12.9749	0.24497	0.259824	306	200
NM_016894	Ramp1	6.75301	0.81304	0.0610458	0.0632114	1835	314
NM_016911	Srpx	0.750182	0.0627362	0.157406	1.50847	940	350
NM_016917	Slc40a1	3.806	0.206797	0.928119	1.51807	1336	91
NM_016976	Grm1	0.37404	na	0.369432	na	2904	131
NM_017466	Ccrl2	20.2651	4.73112	0.196779	0.319882	511	24
NM_017469	Gucy1b3	1.75583	0.289349	0	0	1251	1208
NM_017473	Rdh7	8.28451	0.398823	0.741165	1.6129	524	90
NM_018746	Itih4	3.86138	0.0526748	0.0164622	0	279	142
NM_018826	Irx5	0.259139	0.0302084	0.132307	0	560	306
NM_018830	Asah2	16.5846	2.29125	0.658819	0.793241	2107	61
NM_019423	Elovl2	2.36856	0.226255	0.0322523	0	2912	2798
NM_019432	Tmem37	34.2583	5.69506	0	0	333	186
NM_019446	Barhl1	0.266123	na	0	na	1948	654
NM_019487	Hebp2	16.7194	4.18278	0.171986	0.083955	1011	375
NM_019498	Olfm1	4.72007	0.424499	0	0	1008	956
NM_019510	Trpc3	0.145664	0.053367	0	0	773	694
NM_019517	Bace2	20.3578	4.29037	0.0466096	0.0272689	2117	208
NM_019535	Sh3gl2	0.844086	0.153024	1.12552	1.65854	1626	1296
NM_019540	Pfpl	0.0929417	na	0	na	1615	702
NM_019541	Cts8	0.0234103	na	0.327753	na	1407	272
NM_019545	Hao2	1.12306	0.0378972	0.0959701	0.364686	790	386
NM_019546	Prodh2	0.570435	na	0	na	420	56
NM_019577	Ccl24	1.72808	0.0583136	0.195632	0	858	214
NM_019626	Cbln1	3.86297	0.521419	0.446139	0.168783	1401	830
NM_019631	Tmem45a	107.565	9.46582	0.0115869	0.0117545	1522	418
NM_019656	Tspan6	24.5043	3.40788	0.57054	0.624509	854	185
NM_019677	Plcb1	1.21125	0.0793597	0.267427	1.0528	3206	867
NM_019741	Slc2a5	1.97761	0.0916584	0.0746375	0.589992	937	524
NM_019807	Acpp	18.7086	2.09864	0.42206	0.372342	1458	279
NM_019810	Slc5a1	13.3967	0.437733	0.399107	0.407193	1697	350
NM_019948	Clec4e	0.94585	0.109267	0.249405	0.2307	1751	865
NM_019957	Dnase2b	0.349845	na	0	na	901	356
NM_019959	C1qtnf1	6.87248	0.969829	0.584361	0.894626	3431	445
NM_019978	Dclk1	8.89795	1.72968	1.03581	0.858187	5334	19
NM_019984	Tgm1	12.9196	3.4632	0	0	194	169
NM_019985	Clec1b	0.537096	na	0	na	162	82
NM_020047	Tacstd2	147.781	29.3699	0.648397	0.588947	694	357
NM_020265	Dkk2	1.49847	0.442939	0.666767	0.801288	2184	1539
NM_020272	Pik3cg	7.84507	1.69221	0.388089	0.411629	3181	1153
NM_020274	Htr3b	0.198454	na	0	na	892	510
NM_020278	Lgi1	0.146487	na	0.948522	na	2484	353
NM_020626	Tmem27	0.594156	0.0435363	0.194134	1.69868	507	356
NM_021291	Slc7a9	2.06122	0.0991158	0	0	139	104
NM_021347	Gsdma	42.2991	4.25802	0.0384936	0.0297177	1292	233
NM_021364	Clec5a	0.732765	0.0361393	0.66577	0	3068	194
NM_021365	Xlr4b	0.940654	0.175093	0.212829	0	305	218
NM_021371	Caln1	0.246894	0.172686	0.397949	0	1235	260
NM_021375	Rhbg	16.0626	1.61302	0.0375348	0.0133136	506	246
NM_021377	Sorcs1	2.45628	0.0859004	0.578915	1.91003	3555	254
NM_021386	Cldn10	2.73009	0.42098	0.0389009	0	210	128
NM_021400	Prg4	8.22482	1.68023	0.324177	1.69082	572	118
NM_021427	Fam181b	0.0969646	0.0155422	0	0	446	182
NM_021456	Ces1g	4.72309	0.354654	0	0	536	430
NM_021471	Slco1c1	1.0705	na	0	na	649	78
NM_021472	Rnase4	53.0041	9.79436	0.816999	0.862543	884	155
NM_021476	Cysltr1	0.0935574	0.00499868	0	0	1303	1188
NM_021483	Pex5l	1.43186	0.164775	0	0	1038	981
NM_021486	Bco1	2.1943	0.219824	0.680832	0.531381	460	221
NM_021509	Moxd1	0.830358	0.129849	1.59264	1.01575	1154	265
NM_021517	Pdzk1	4.28254	0.751628	0.879845	1.26269	763	310
NM_021890	Fads3	3.0964	0.155098	0.3863	0.605466	1735	308
NM_022029	Nrgn	8.06548	0.534949	0.509312	0.250643	839	256
NM_022032	Perp	350.571	72.7564	0.807915	0.796882	1196	133
NM_022312	Tnr	0.430056	0.0689324	1.15367	0.121439	709	42
NM_022317	Slc28a3	0.797738	na	1.06045	na	2382	4
NM_022321	Parvg	1.71567	0.222784	0	0	1530	1494
NM_022413	Trpv6	0.952507	0.0872426	0.124817	0	449	156
NM_022434	Cyp4f14	3.02841	0.0100604	0	0	431	377
NM_022723	Scube1	1.58799	0.350186	0.265095	0.205531	4742	708
NM_022884	Bhmt2	0.039184	na	0	na	966	807
NM_023113	Aspa	0.486269	0.127542	0.497475	0.347443	448	196
NM_023118	Dab2	1.21428	0.0364936	0.0798353	0	1928	850
NM_023125	Kng1	3.23464	0.0797646	0.0826284	0	502	111
NM_023134	Sftpa1	20.742	2.90178	0.211918	0.22202	1927	29
NM_023256	Krt20	48.7588	8.86615	0.690383	1.02336	578	266
NM_023333	2210010c04rik	0.820896	na	0	na	1367	94
NM_023395	Wfdc1	2.04109	0.101783	0	0	342	310
NM_023537	Rab3b	6.07903	0.337193	0.0228031	0.0775226	2511	375
NM_023543	Chn2	6.24835	0.801223	0.430896	0.514502	1568	51
NM_023557	Slc44a4	5.22518	0.926628	0	0	200	113
NM_023631	Aox4	6.53148	1.46235	1.66617	1.4097	783	114
NM_023727	Rd3	14.0979	1.13756	0.0277372	0.230767	2779	886
NM_023729	Asz1	1.63105	na	0.0378673	na	287	146
NM_023785	Ppbp	4.87911	na	0.596323	na	653	216
NM_023814	Tbx18	0.741595	0.161399	0.302074	0.389328	2421	555
NM_023852	Rab3c	1.35879	0.171598	0.05549	0.136457	7627	235
NM_023872	Kcnq5	0.242075	0.054322	0.668232	0.59468	3760	476
NM_023878	Cldn10	2.73009	0.42098	0.0389009	0	210	128
NM_023903	Lipm	28.4655	3.05566	0.324193	0.267648	1291	738
NM_023907	Foxi1	4.89457	0.100657	1.12753	0	1169	380
NM_024246	Tmem79	17.1034	3.01183	0.102614	0.127689	1066	674
NM_024271	1700016d06rik	0.172448	na	0	na	681	125
NM_024286	Popdc3	1.12235	0.213213	0.20971	0.0786411	470	137
NM_024435	Nts	69.8996	0.755418	0.16312	0.076199	575	187
NM_025357	Smpx	0.975367	na	0.583401	na	418	66
NM_025451	Camk2n1	13.3685	1.60404	0.177923	0.317841	3338	841
NM_025466	Gkn1	6.4904	na	0.0422605	na	622	114
NM_025467	Gkn2	3.5556	na	0.0233264	na	191	86
NM_025572	2610528j11rik	11.6447	1.96221	0	0	422	383
NM_025585	1700029f12rik	8.01503	2.13706	0.14328	0.0765631	587	314
NM_025622	Lgals2	63.189	3.14348	0.089396	0.192024	147	110
NM_025655	Tmigd1	17.5918	2.54927	0.10608	0.0391115	557	445
NM_025721	Spesp1	0.0397655	na	1.15187	na	1696	175
NM_025749	Zfp474	0.882674	0.0916639	0.322425	0.398124	510	357
NM_025760	Hacd4	0.267273	0.0428403	0.762183	1.52437	1334	308
NM_025768	Grtp1	1.62778	0.391369	0	0	184	124
NM_025777	Duoxa2	3.94475	0.345515	0.0476471	0	488	210
NM_025809	Clec14a	0.368753	0.0518193	0.414843	0.675972	2735	344
NM_025968	Ptgr1	21.3922	2.20097	0.0100356	0	1063	130
NM_026018	Pdzk1ip1	88.8191	7.47356	0	0	346	314
NM_026092	Lyzl1	0.207348	na	0	na	262	140
NM_026162	Plxdc2	10.1748	1.4157	0.0871753	0.073037	808	376
NM_026180	Abcg8	6.83924	1.34472	0.259533	0.430708	1534	435
NM_026208	1700019n19rik	0.0659745	na	0	na	193	133
NM_026243	Mgat4c	0.638807	na	0.329026	na	2105	862
NM_026251	Patl2	1.38384	0.611893	1.0069	0.146	341	216
NM_026336	2310057j18rik	2.1702	0.160549	0	0	291	212
NM_026380	Rgs8	0.602306	0.0817766	1.16076	0.625389	4758	1046
NM_026385	Pllp	5.1747	0.445064	0.0634497	0.180186	1268	711
NM_026505	Bambi	6.43047	1.10088	0	0	4004	357
NM_026571	Lhfpl5	1.29299	0.0487644	0	0	270	183
NM_026593	D730048i06rik	0.36286	0.085712	0.395387	0.107319	917	310
NM_026680	Golt1a	2.3823	0.169712	0.171197	0.120845	1376	287
NM_026687	Serpina1f	0.0311023	na	0	na	1688	91
NM_026701	Pbld1	0.737715	0.126898	0.838415	0.4375	1075	371
NM_026743	Tspan11	0.978957	0.0130762	0.227774	3.94808	3179	367
NM_026793	Myct1	0.425077	na	0.0908522	na	2088	284
NM_026838	Srpx2	4.74119	0.538298	0.0895298	0	984	348
NM_026886	Srrm4	0.264901	0.0825616	0.924768	0.167242	5295	2060
NM_026972	Cd209b	0.250248	na	0	na	1020	197
NM_027035	1700001l19rik	5.00365	0.575495	0.0331165	0.123071	1222	276
NM_027153	Pir	11.4382	3.11677	0.0101066	0.0396337	448	222
NM_027209	Ms4a6b	1.16915	0.105712	0.04447	0.945997	820	485
NM_027286	Ace2	3.53556	0.143167	0.739303	1.18182	818	125
NM_027301	Sdr9c7	33.7545	4.54045	0.565052	0.846889	1797	419
NM_027363	Chp2	1.30333	na	0.808284	na	364	240
NM_027398	Kcnip1	1.13684	na	0	na	1210	764
NM_027407	Ica1l	0.469112	0.0154241	0.987179	1.5	2056	608
NM_027442	Ddo	1.31214	0.155578	0.127634	0.276068	1890	1370
NM_027468	Cpm	13.1575	1.13529	0.403566	0.600843	3832	1139
NM_027562	Clec2g	6.93207	1.0497	0.696272	0.745807	1620	108
NM_027664	Rimklb	1.88404	0.399194	0.343519	0.0989981	2588	610
NM_027669	43355	1.51726	na	0.398419	na	1484	1023
NM_027741	Mro	2.6637	0.302493	0.19422	0.502578	1236	832
NM_027853	Mettl7b	2.35645	0.0437924	0.653712	0.601415	442	18
NM_027872	Slc46a3	7.01097	0.822573	0.133957	0.199643	692	590
NM_027884	Tns1	3.23856	0.344843	0.923607	1.0683	4299	616
NM_027948	1700003e16rik	2.04393	0.128634	0	0	84	54
NM_027984	Epn3	5.68871	2.26268	0.583607	0.31358	1552	167
NM_028034	Tdrd12	0.595705	na	0	na	190	169
NM_028052	Synpr	1.99518	0.167875	0	0	1488	1405
NM_028055	Btbd17	0.883582	0.0515006	0.142583	0	779	226
NM_028060	Slc35f2	5.17583	0.928506	0	0	1190	1152
NM_028087	Gcnt3	1.42978	na	0.33921	na	2475	428
NM_028094	Ugt2a3	1.17739	0.0520608	0	0	480	134
NM_028238	Rab38	6.22924	0.735712	0	0	812	697
NM_028296	Car10	0.328628	na	0.219917	na	1413	931
NM_028408	Cnih3	0.0383078	na	3.09297	na	1389	654
NM_028550	1700074p13rik	0.0328628	na	0	na	532	115
NM_028572	Vgll3	0.88009	0.209325	0.296009	0.273579	2353	1183
NM_028589	1700125h20rik	0.825819	0.0481338	0	0	183	146
NM_028623	Cst6	184.249	44.4636	8.99154e-05	0.000796292	3261	107
NM_028664	Ankrd45	0.252738	0.0138894	0.484175	0	2796	2369
NM_028707	Psd2	2.16597	0.413169	0.0920762	0.412638	1867	1736
NM_028713	Rftn2	0.441931	0.0833362	0.235776	0.464106	1650	62
NM_028734	Steap2	0.411327	0.0453715	0.012279	0.107057	8578	1681
NM_028746	Slc7a13	0.086797	0.0556498	0	0	622	350
NM_028747	Them7	0.585581	0.0288803	0	0	852	781
NM_028748	Paqr5	5.42031	1.05029	0.24975	0.381182	2308	481
NM_028783	Robo4	1.28488	0.0610221	0.980802	0.395248	635	172
NM_028810	Rnd3	39.7084	8.01823	0.913811	0.915905	1855	913
NM_028825	Tex37	0.721525	na	0	na	175	96
NM_028829	Paqr8	1.66794	0.211908	1.10863	1.15935	3068	68
NM_028930	Tmc5	9.45424	0.611893	0.478782	0.824859	422	245
NM_028943	Sgms2	13.2225	2.52379	0.485364	0.513582	4121	369
NM_029007	Fam84a	35.7759	4.35449	0.172268	0.276176	2248	2183
NM_029011	Pyroxd2	1.00099	0.0641785	0.643622	0.887755	1061	277
NM_029021	Ocstamp	0.870864	na	0	na	396	317
NM_029163	Usp50	0.806355	0.144758	0.203226	0	402	30
NM_029296	1700001c19rik	0.17143	na	0.622358	na	828	175
NM_029305	1700003f12rik	0.412909	na	0	na	101	56
NM_029372	Ccdc172	0.0492013	na	0	na	171	114
NM_029416	Klf17	0.578608	0.00378544	1.17281	0	2448	1293
NM_029426	Brsk2	0.466922	na	0.752219	na	1749	782
NM_029499	Ms4a4c	1.4283	0.228937	0.0398511	0.597767	910	298
NM_029639	Plet1	61.4471	5.84353	0.0711441	0.0473961	1094	590
NM_029815	Bcas1	1.84876	0.405507	0.986372	0.942327	1083	104
NM_029879	Rgs7bp	1.20245	0.0700861	0.482137	1.36865	4338	147
NM_029972	Ermn	0.91354	0.0342023	0.170506	1.41572	2639	794
NM_030061	Spink12	39.9599	1.2214	0.0979231	0.0617761	439	143
NM_030067	Adgrf4	11.8573	1.52346	0	0	712	687
NM_030098	Rnase6	0.502027	0.0919639	0.728863	0	507	388
NM_030554	Rab27b	6.59868	0.842244	0.0492359	0.14488	6057	1527
NM_030598	Rcan2	0.849623	0.181578	0.847476	0.829634	2383	85
NM_030599	Klrb1b	0.652681	0.0418465	0.216158	0	1471	792
NM_030611	Akr1c6	0.449255	na	0	na	339	209
NM_030687	Slco1a4	0.112855	na	2.71714	na	1521	243
NM_030706	Trim2	2.21406	0.269349	0.672638	1.02411	3223	1381
NM_030888	C1qtnf3	2.27821	0.0659657	0.380603	0.732839	1487	1025
NM_031169	Kcnmb1	1.91165	0.246833	0.113573	0.125322	3274	386
NM_031186	Ndst3	0.0761688	na	0.329966	na	2645	566
NM_031194	Slc22a8	0.319909	na	0.283319	na	1558	405
NM_031195	Msr1	0.0868692	na	0.847183	na	2520	390
NM_031197	Slc2a2	0.72572	0.192026	0.145897	0.353519	884	555
NM_031378	Gsdmc	4.0515	0.180762	0	0	706	594
NM_032397	Kcnn1	6.05115	0.978556	0.30373	0.503626	2267	239
NM_033078	Klrk1	0.0356181	na	1.98496	na	2465	371
NM_033264	Arpp21	0.353361	0.160782	0	0	674	506
NM_033373	Krt23	66.6883	6.27678	0	0	224	203
NM_052977	Adarb2	0.132023	0.0125402	0	0	2906	1604
NM_053015	Mlph	17.6601	1.75022	0.52654	0.51001	2533	1013
NM_053077	Slc45a2	1.23992	na	0.0609417	na	1294	372
NM_053108	Glrx	36.8394	7.33089	0.767737	0.76064	908	149
NM_053123	Smarca1	0.902809	0.0801463	0	0	751	485
NM_053190	S1pr5	0.561254	0.0648904	0.729611	1.61841	1009	690
NM_053247	Lyve1	0.43171	0.124078	1.089	0.732648	1565	398
NM_054055	Slc13a3	2.39443	0.045487	0.71654	1.60458	1385	314
NM_057173	Lmo1	4.35432	0.205045	0	0	299	248
NM_080285	Cttnbp2	6.16023	1.00123	0.042839	0.168991	894	663
NM_080434	Apoa5	1.52129	0.0398112	0.850337	1.90631	1185	155
NM_080440	Slc8a3	0.21632	na	1.08497	na	1576	871
NM_080450	Gjc3	0.332351	0.0149826	1.95546	0	2636	2569
NM_080563	Rnf144a	0.258307	0.047318	1.56184	1.16241	3860	104
NM_080639	Timp4	7.26731	0.953285	0.105975	0.697279	670	376
NM_080640	Baalc	0.142216	0.0214545	2.87906	0.470615	2036	930
NM_080644	Cacng5	0.927596	0.276123	0.85349	0.493199	2747	1845
NM_080845	Ftcd	0.699801	na	0.368368	na	1026	249
NM_080853	Slc17a6	0.548144	0.0527162	1.5486	3.31388	1766	935
NM_130865	Dmbx1	0.488639	na	1.64237	na	2832	347
NM_130886	Card14	11.6918	3.3707	0.566562	0.854678	634	446
NM_130887	Papln	1.02149	0.155406	0	0	375	327
NM_133222	Adgrl4	0.582425	0.0118546	0.495112	0	1785	879
NM_133353	Oosp1	3.76262	0.0194548	0	0	230	154
NM_133653	Mat1a	6.02719	1.09432	0.0633724	0.0895136	1807	1693
NM_133654	Cd34	8.07423	1.51606	0.934421	1.38241	1171	116
NM_133675	Sptssb	14.6492	0.737447	0.190233	0.207673	1333	458
NM_133681	Tspan1	87.0046	11.0753	0.0822446	0.0622398	1107	378
NM_133690	Atp1b4	0.133432	0.0038022	0	0	2991	2775
NM_133882	C8b	1.1718	0.324425	0.90717	0.565604	388	175
NM_133960	Ces2a	24.6745	3.14968	0.148607	0.0311005	218	47
NM_134054	Sptssa	76.693	18.7174	0.0978577	0.0994354	1058	935
NM_134094	Ncald	0.664139	0.0419814	1.53462	3.8	2653	833
NM_134103	Il1rap	0.994336	0.252204	0	0	1086	616
NM_134157	Atp6v1b1	2.07651	0.0271704	0.838776	0	317	247
NM_134251	Slc12a8	1.36357	0.0233133	0.0348998	0.327186	1048	316
NM_138684	Wfdc12	4.35432	0.237597	0	0	428	163
NM_144511	Ces3b	0.364305	0.0222451	0	0	329	306
NM_144518	2900011o08rik	0.372562	0.119434	1.90098	0.563253	1589	261
NM_144538	Rab3il1	2.33391	0.234508	0	0	1047	917
NM_144790	Ankrd33	0.035222	na	0	na	303	267
NM_144836	Slc17a2	0.411137	na	0	na	1223	458
NM_144850	Rapgef3	0.622918	0.117465	0	0	778	594
NM_144903	Aldob	79.848	2.35668	0.127748	0.0712963	798	366
NM_145079	Ugt1a6a	37.9904	4.55903	0	0.00243968	1578	574
NM_145137	Mgl2	4.93414	0.116627	0.553863	1.4022	429	190
NM_145142	Chst10	0.557465	0.126147	0.770815	0.145598	1625	1321
NM_145148	Frmd4b	11.3916	1.88379	0.334238	0.0827158	1493	1278
NM_145210	Oas1e	8.2912	0.0276869	0	0	612	590
NM_145219	Lgi3	0.846673	na	0.298391	na	1290	118
NM_145228	Oas1h	7.89737	0.0849205	0.0350072	0	559	496
NM_145369	Wfdc5	3.19934	0.0633592	0.119258	0	1841	540
NM_145383	Rho	1.23889	0.280344	0.137041	0.182722	2111	367
NM_145489	Ai661453	9.55629	1.86333	0.229647	0.197771	1245	745
NM_145532	Mall	14.8944	1.11982	0.527368	0.262749	1471	655
NM_145539	Tm4sf4	1.19744	0.0697941	0.50226	0	584	222
NM_145602	Ndrg4	2.42641	0.316356	0	0	1787	1557
NM_145741	Gdf10	1.29324	0.448812	0.148325	0.0548047	769	542
NM_145838	St8sia6	4.99676	0.233918	0.731343	0.979129	1884	80
NM_145935	Glyat	1.43914	0.023659	0	0	106	69
NM_145976	Tifab	0.391033	0.0365619	0.395766	0.328948	2482	625
NM_145980	8430408g22rik	84.9147	14.7323	0.466694	0.460972	532	176
NM_146010	Tspan8	56.5426	5.92995	0.0517104	0.0441897	497	220
NM_146017	Gabrp	29.0259	1.17859	0	0	1759	1682
NM_146071	Muc20	0.522518	na	0	na	541	281
NM_146082	Bc027072	0.0549094	na	0	na	961	579
NM_146086	Pde6a	0.307206	0.0342548	0.91053	1.39615	1509	575
NM_146095	Rorb	0.184799	na	0.518332	na	1312	221
NM_146126	Sord	11.696	2.49677	0.856734	0.878547	1131	487
NM_146140	Tram1l1	0.241178	0.0470616	0	0	976	569
NM_146187	Ffar2	0.996191	0.103017	0.675454	1.12749	764	91
NM_146197	Acsm2	3.06321	0.405779	0.161841	0.295842	4685	592
NM_146214	Tat	1.05144	na	0.704303	na	915	621
NM_146223	Cplx3	1.0534	0.092801	0	0	2245	858
NM_146241	Trhde	0.16719	0.00315275	0.550034	0	2574	1627
NM_146244	Rps6kl1	12.2691	2.78405	0.186107	0.122289	777	613
NM_148949	Tdpoz1	0.619527	0.019376	0.407447	0	1045	631
NM_152804	Plk2	66.5976	12.5803	0.0401211	0.0302612	619	531
NM_152839	Jchain	4.086	0.156942	0.0107508	0	1504	711
NM_153069	Leap2	0.933068	0.132941	0.184818	0	232	131
NM_153098	Cd109	2.98351	0.594542	0.607581	0.76564	1202	49
NM_153166	Cpne5	5.57116	0.586186	0.00559873	0.0545856	2501	1105
NM_153170	Slc36a2	2.96481	0.0942995	0	0	876	853
NM_153393	Col23a1	2.52858	0.170652	0.108889	0.69738	3859	1044
NM_153408	Neurl3	24.558	4.66964	0.0305703	0.0412313	1758	1700
NM_153413	Dock3	0.641334	0.122636	1.48455	1.44193	2569	264
NM_153424	Nphp4	0.844587	0.144402	0.372691	0	406	323
NM_153506	Clec2e	5.40362	0.787881	0.0528403	0	1590	1407
NM_153508	Clstn3	2.23555	0.128357	1.00171	0.573626	836	381
NM_153543	Aldh1l2	1.98618	0.133577	0.433154	2.05654	3132	571
NM_153820	Arhgap15	0.503805	0.215343	1.09836	0.648214	1139	179
NM_170597	Creg2	0.392602	na	0.0407941	na	4690	340
NM_172439	Inpp5j	11.7966	2.78464	0.0266029	0.0180641	388	277
NM_172447	Cfap69	0.210354	na	0.232584	na	214	36
NM_172514	Tmem71	0.306604	0.02759	0	0	1707	1603
NM_172553	Alx1	0.205362	na	1.66844	na	1341	1036
NM_172614	Tmem44	1.4549	0.15991	0.371025	0.479436	2860	311
NM_172861	Slc7a14	0.109439	0.00526251	0	0	6220	6043
NM_172874	Podn	0.668609	0.091094	0	0	903	844
NM_172928	Dclk3	6.58279	0.0375995	0.297863	1.8073	941	448
NM_172938	Scml4	0.650372	0.0355962	0.563868	2.20177	3038	972
NM_172961	Abat	2.35655	0.287541	1.11513	1.12908	2941	946
NM_172994	Ppp2r2c	0.465024	0.0632438	1.15706	0.404054	2436	1562
NM_173365	Gpr20	1.18138	0.0496681	1.18856	1.92824	855	272
NM_173371	H6pd	11.7333	1.86528	0.643618	0.430783	2077	1806
NM_173385	Cilp	18.139	0.686535	0.471569	0.57834	228	3
NM_173417	Kcns3	0.747599	0.162627	0	0	1019	481
NM_173770	Fam69c	0.200199	na	0	na	849	825
NM_173772	Neu4	0.303876	na	0.0421604	na	2914	195
NM_173868	St18	1.68318	0.218962	0.509109	0.984463	2340	216
NM_174857	Mamdc2	0.686304	0.0356775	0	0	1013	874
NM_174876	Impg2	0.072572	0.162853	0.965618	0.050162	2961	227
NM_174992	Smagp	12.3547	1.69019	0	0	508	485
NM_175020	Prss58	0.30827	na	0	na	100	76
NM_175188	43160	0.428294	0.0483092	0.436915	2.86559	3107	1897
NM_175189	Hepacam	1.36166	0.0575621	0.444799	1.57191	1760	279
NM_175256	Heg1	1.89499	0.175199	0.0666031	0	1385	1316
NM_175271	Lpar4	0.0851511	0.0198525	0	0	2575	1137
NM_175276	Fhod3	3.98018	0.969716	0	0	508	464
NM_175279	Rassf10	4.1693	0.76139	0.594141	0.4491	1738	497
NM_175406	Atp6v0d2	1.75821	0.0352273	0.444408	1.03426	1381	155
NM_175462	Kcnt1	1.23641	0.103399	0.613104	0.276498	2156	203
NM_175475	Cyp26b1	0.510023	0.040875	2.5849	2.66485	2853	290
NM_175484	Coro2b	3.78882	0.688876	0.989635	1.22423	1790	638
NM_175675	Slc35f6	12.7172	2.31457	0.443201	0.361101	1880	270
NM_175692	Snhg11	0.614399	0.0686377	1.83348	3.73767	5207	1790
NM_175731	Acer1	5.24486	0.47318	0.0266275	0.0135166	1589	716
NM_176950	Defb20	1.20363	na	0	na	339	127
NM_177039	A530016l24rik	1.41145	0.0180989	0.768531	2.90012	1864	1013
NM_177083	B430306n03rik	0.125974	0.0070233	0.280733	1.61421	2326	1341
NM_177084	Slc9a4	6.23935	1.47952	0.405221	0.316519	1139	829
NM_177129	Cntn2	2.41654	0.138206	0.103181	0.170105	6109	3734
NM_177175	Tmem215	0.730612	0.146385	0.242023	0.290428	1021	627
NM_177307	Cyp4f39	8.68178	2.43311	0	0	841	795
NM_177343	Camk1d	2.24967	0.367397	0.99627	0.939947	5526	1112
NM_177406	Cyp4a12a	1.17813	0.0102075	0.305871	1.25747	813	378
NM_177408	Gabrg2	0.198374	na	0.404608	na	2121	602
NM_177469	Adgra1	0.131286	na	2.46113	na	1894	762
NM_177566	Arhgef15	0.237149	na	0.542693	na	1524	509
NM_177568	Plcb2	25.0373	3.40534	0.408318	0.213866	1482	1252
NM_177584	Btla	0.563273	0.0991368	0.781009	0.406443	2298	1328
NM_177678	Ablim2	3.19779	0.690252	0.241509	0.151022	1560	703
NM_177686	Clec12a	3.72989	0.341631	0.0105291	0	1241	354
NM_177769	Elmod1	1.0489	na	1.63161	na	1262	458
NM_177785	Fam205c	0.853157	na	0.100074	na	506	302
NM_177829	Spink10	0.9505	na	0.424174	na	401	293
NM_177900	Hapln4	0.368386	0.0472379	0.64065	0	2341	1972
NM_177906	Opcml	0.323795	0.0495763	1.24264	1.78204	4861	1701
NM_178255	Hapln3	1.56255	0.0267154	0	0	183	134
NM_178396	Car12	21.0448	3.63861	1.02114	0.882617	2488	619
NM_178594	Vtcn1	0.967626	0.0610221	0.792634	0.293034	1625	376
NM_178608	Reep1	3.5385	0.403325	1.09914	1.18725	2904	432
NM_178628	Atl1	0.955561	0.215822	0	0	747	691
NM_178631	Ralyl	0.102018	na	0	na	1232	921
NM_178669	Clrn3	34.2013	6.82087	0.0184514	0.0131125	2483	1172
NM_178676	Entpd3	9.10448	2.75116	0.736736	0.469094	1784	313
NM_178680	Unc45b	0.902724	0.161718	0	0	655	395
NM_178681	Dgkb	0.101988	na	0.39685	na	2720	1429
NM_178692	C130074g19rik	42.9258	10.5691	0.872071	0.860944	2382	543
NM_178703	Slc6a1	0.314129	na	0.396989	na	2116	1697
NM_178706	Siglech	0.087966	na	1.36386	na	1351	117
NM_178717	Rxfp3	0.33651	0.0111596	0	0	2149	1583
NM_178777	Nhlh2	0.101263	0.0108208	0	0	2431	1656
NM_178779	Rnf152	0.692868	0.0689324	0.663881	0.85316	7302	846
NM_178785	Rasal3	1.58837	0.40384	0.277338	0.26899	419	162
NM_178804	Slit2	1.14117	0.14042	0.0854251	0	1537	1269
NM_178872	Trim36	1.25235	0.172941	0.351832	0.496457	2113	97
NM_178887	Fibcd1	1.56465	0.0650003	0.703269	0.516847	3148	2317
NM_178899	Hepacam2	25.3553	4.44643	0	0	824	708
NM_178906	Ai593442	0.122411	0.0336357	0.241385	0.204812	4634	1392
NM_181045	Caln1	0.246894	0.172686	0.397949	0	1235	260
NM_181390	Mustn1	3.32689	0.125472	0.162045	1.05952	580	160
NM_181398	Anks1b	0.247165	na	0	na	3070	1545
NM_181853	Trim66	1.82274	0.0216416	1.3555	21.7161	4974	198
NM_182783	Fam167b	0.897377	na	0	na	250	196
NM_182930	Plekha6	12.6768	2.79006	0.48764	0.447927	3727	1511
NM_183064	Fgf12	3.24397	0.82357	0.0945456	0.184961	2297	281
NM_183147	Sprn	0.182516	na	0.4235	na	2586	558
NM_183187	Fam107a	1.3662	0.157219	0.823625	0.973375	2412	1135
NM_183190	Ms4a5	0.254267	na	0	na	331	35
NM_183335	Igsf1	0.106203	na	0	na	178	138
NM_197996	Tspan15	16.53	1.92438	0.0828195	0.0794517	2617	645
NM_198302	Rbm11	0.312741	0.0822619	0.494164	0.240905	1925	798
NM_198614	C2cd4c	0.087187	0.00429998	0	1.00894	5198	1337
NM_198649	Ablim3	1.86395	0.156731	0.734153	1.35832	1902	171
NM_198864	Slitrk3	0.0552837	0.00746211	0	0	370	50
NM_199018	Stard8	0.747749	0.174334	0.236237	0.38979	1528	1035
NM_199311	Clec4a1	1.0778	0.0552824	0.921625	1.57812	694	54
NM_201239	Rnase4	53.0041	9.79436	0.816999	0.862543	884	155
NM_201531	Kcnf1	0.125582	0.0247744	0.718613	0	2601	285
NM_201641	Ugt1a10	37.9904	4.55903	0	0.00243968	1578	574
NM_201642	Ugt1a7c	37.9904	4.55903	0	0.00243968	1578	574
NM_201643	Ugt1a5	37.9904	4.55903	0	0.00243968	1578	574
NM_201644	Ugt1a9	37.9904	4.55903	0	0.00243968	1578	574
NM_201645	Ugt1a1	37.9904	4.55903	0	0.00243968	1578	574
NM_207243	Muc19	0.0352576	0.158238	0	0	177	72
NM_207244	Cd200r4	0.518812	0.0475194	0	0	719	698
NM_207624	Ace	4.38278	0.182468	0.316116	0.21733	930	226
NM_207649	Rcan2	0.849623	0.181578	0.847476	0.829634	2383	85
NM_207707	Esr2	0.683436	na	0.620636	na	1311	654
NM_213614	43348	21.4813	3.46041	0.877797	0.766504	929	348
NR_001592	H19	18.4221	1.12044	1.136	1.10439	2615	598
NR_002873	Vax2os	1.10678	0.0160063	0	0	1919	1894
NR_003718	Miat	0.622377	na	1.52791	na	7008	167
NR_015388	Dlx6os1	0.547894	0.0924425	0.645737	0.563711	4022	379
NR_015459	4933431e20rik	2.19359	0.186586	0.500794	0.581616	4658	2034
NR_030701	Gm20554	0.328772	0.0245106	0.366199	0.323006	5099	2278
NR_033214	B430212c06rik	0.0870864	0.0977117	1.86506	0.125382	2208	385
NR_033217	Bc030870	0.882501	na	0.3052	na	1050	468
NR_033657	Miat	0.608107	na	1.56376	na	7008	167
na is for genes for which d3'UTR ratios could not be calculated due to the absence of reads mapping to regions upstream of proximal pAs in last exons
