# Supplementary material for: Aire-dependent genes undergo Clp1-mediated 3’UTR shortening associated with higher transcript stability in the thymus
Source: eLife. 2020 Apr 29;9:e52985. doi: 10.7554/eLife.52985 (PMC7205469; doi:10.7554/eLife.52985)
Supplement: Figure 4—source data 1. — na is for genes for which d3'UTR ratios could not be calculated due to the absence of reads mapping to regions upstream of proximal pAs in last exons. [file elife-52985-fig4-data1.xlsx]

## Sheet: AIRE_pour_ratio_MUTANT
Figure 4–source data 1: List of Aire-sensitive genes with proximal pAs in Ctr and Clp1 KD mTEChi
Refseq	Gene symbol	FoldChange	Expression (RPKM)		d3'UTR ratio		length (bp)
		WT vs Aire KO	Ctr	Clp1 KD	Ctr	Clp1 KD	long 3'UTR	short 3'UTR
NM_001001488	Atp8b1	4.86532	1.6287	0.676612	0.0948105	1.21404	2361	2214
NM_001001979	Megf10	3.19372	na	0.362003	na	0	3412	3346
NM_001001985	Nat8l	3.22957	0.215439	0.0520925	0.529732	1.16541	4769	791
NM_001001999	Gp1bb	5.67244	na	0.964748	na	0	403	252
NM_001002005	Panx2	9.35303	na	na	na	na	1030	578
NM_001002897	Atg9b	4.3117	0.187156	2.27563	18.6593	1.94368	891	709
NM_001003815	Epb41l1	4.61073	0.966911	0.367395	0.661074	0.319788	3396	484
NM_001004148	Slc13a5	21.7458	na	0.0771076	na	0.944284	1511	129
NM_001004761	Gpr158	7.01477	na	0.140489	na	0.639826	2849	834
NM_001005863	Mtus1	3.29459	8.1905	2.35138	0.558171	0.683906	2508	368
NM_001005864	Mtus1	3.39932	8.1905	2.35138	0.558171	0.683906	2508	368
NM_001005865	Mtus1	3.42479	8.1905	2.35138	0.558171	0.683906	2508	368
NM_001006664	Epb41l1	4.62899	0.966911	0.367395	0.661074	0.319788	3396	484
NM_001008231	Daam2	4.0857	na	0.250001	na	1.40641	2504	100
NM_001008424	Cdsn	11.2917	1.27117	9.70476	0	0.245776	919	649
NM_001008702	Dab2	5.56607	1.1869	1.05229	0.0177412	0.248377	1928	850
NM_001010941	Gpr12	Inf	0.533711	na	0	na	956	356
NM_001012306	Hsd3b3	12.5681	na	0.738378	na	0	408	360
NM_001013773	Nxpe5	Inf	0.0320161	1.5328	0	0	231	176
NM_001018002	Dppa4	Inf	1.30553	na	0	na	560	505
NM_001024539	Shc2	5.49136	na	1.29395	na	0.208701	2162	597
NM_001024672	Methig1	5.05231	1.71676	2.79045	1.03869	1.33218	644	173
NM_001024707	Lrp3	4.11852	1.25142	0.184917	3.13201	0.502462	1148	65
NM_001025372	Adcyap1r1	12.007	0.0410106	0.0363597	0.164439	0.493316	4284	918
NM_001025565	Lhx9	4.67652	0.0318812	na	0	na	3468	655
NM_001025567	Dmbx1	59.2359	na	0.351311	na	1.22179	2832	347
NM_001025575	Cfhr2	3.17959	0.445086	1.43494	0	0.167964	531	364
NM_001025581	Kcnc2	Inf	0.117715	na	18.2744	na	4212	2186
NM_001033149	Ttc9	10.0231	1.79851	0.724793	0.212837	1.03013	1346	753
NM_001033239	Csta1	4.03217	0.230451	3.67768	0	0	2298	71
NM_001033266	Gm525	5.77257	5.07031	1.31401	0	0	179	155
NM_001033286	Slc30a10	25.6429	na	0.94411	na	0.490115	4206	1205
NM_001033347	D430041d05rik	5.97091	1.21512	na	0.39482	na	5706	596
NM_001033366	Dpcr1	63.5227	na	0.489364	na	0.861257	1078	505
NM_001033374	Gm694	12.081	0.0412716	0.146364	0	0	357	122
NM_001033397	Krt26	3.86712	na	na	na	na	1150	938
NM_001033424	Fnd3c2	3.50739	na	na	na	na	453	46
NM_001033445	Garem1	3.46675	na	1.08784	na	0.577021	1783	212
NM_001033872	Smagp	5.36331	10.8027	1.09112	0	0	508	485
NM_001034874	Shisa6	8.11281	0.0896277	0.305306	1.19303	1.15334	5747	4261
NM_001037719	Btla	5.55336	0.014394	0.663604	81.2887	1.18807	2298	1328
NM_001037905	Dab2	5.50465	1.1869	1.05229	0.0177412	0.248377	1928	850
NM_001037987	Edil3	4.56776	na	na	na	na	3405	2716
NM_001038604	Clec5a	57.5212	na	4.88473	na	0.366987	3068	194
NM_001038613	Olfm1	9.01443	4.11957	0.678651	0	0	1008	956
NM_001039000	Kif5a	4.4928	0.139736	na	1.29767	na	2727	1350
NM_001039347	Kcnd3	4.05855	na	na	na	na	4793	2406
NM_001039364	Mobp	Inf	na	na	na	na	2901	424
NM_001039365	Mobp	Inf	na	na	na	na	847	130
NM_001039555	Cyp2c68	3.8289	0.328977	na	0	na	233	22
NM_001039653	Lhx3	13.4937	na	na	na	na	881	283
NM_001039657	Mtl5	11.6913	0.0491329	na	0	na	675	269
NM_001039676	Slc39a2	5.28854	na	1.69568	na	0	1214	269
NM_001040689	Rspo4	45.8883	2.34119	0.360988	0	1.69653	1537	354
NM_001040692	Slc6a18	Inf	na	1.17091	na	0.450524	2372	83
NM_001043317	Cd22	10.1046	2.22916	0.0241019	0	0	1127	703
NM_001043354	Rorb	6.09178	na	1.54808	na	0.119157	1312	221
NM_001077353	Gsta3	6.02205	3.50641	2.12704	0	0	597	249
NM_001077595	Shroom3	3.28507	0.896649	2.13384	0.343653	0.298731	1035	593
NM_001077596	Shroom3	3.27356	0.896649	2.13384	0.343653	0.298731	1035	593
NM_001080979	Tead4	4.51526	3.14417	na	0	na	1223	182
NM_001081074	A1cf	8.08648	0.810692	na	0.455285	na	1896	912
NM_001081076	Gucy2g	9.71587	1.29447	0.0819759	0	0	586	386
NM_001081124	Map7d2	18.0241	na	0.244868	na	0	1364	1040
NM_001081146	Prickle2	4.94111	na	na	na	na	5054	57
NM_001081178	Adgrf5	3.86658	9.31111	2.43788	0.0832256	0.164838	4222	1117
NM_001081180	Spink5	4.28505	3.62881	7.6667	0.648362	0.735766	1646	276
NM_001081186	Tmem52b	9.58686	0.0146259	0.790999	0	0.193849	1832	1307
NM_001081206	Dgki	5.19769	0.110191	0.553603	0	1.36377	1354	501
NM_001081227	Stum	5.49924	na	na	na	na	5956	1205
NM_001081369	Ccdc153	4.95609	3.31033	1.25782	0	0.0446927	421	63
NM_001081389	Nlrp6	5.74346	1.65579	1.86838	0	0.842458	1018	660
NM_001081391	Csmd3	3.14203	na	0.362818	na	0	1813	1615
NM_001081414	Grm5	16.3678	na	0.172802	na	0.378128	4194	3886
NM_001081493	Cartpt	70.6154	8.21697	1.27489	0.0171584	0.24512	435	113
NM_001081567	Mapk10	3.86712	na	na	na	na	5237	817
NM_001081977	Rnf144a	6.11136	2.59696	0.0852758	1.04954	6.97444	3860	104
NM_001082483	Efr3b	3.1067	1.72876	0.0166598	1.68915	0	3888	2310
NM_001082553	Rab27b	5.02811	1.33526	5.59095	0.0112583	0.0087407	6057	1527
NM_001083322	Klrk1	24.5517	na	1.81085	na	0.106147	2465	371
NM_001083342	Ptchd2	83.0082	na	1.52065	na	0.204436	4399	709
NM_001083806	Gria2	Inf	0.00577446	0.0102392	0	0	3779	3682
NM_001083895	Srpx2	6.83105	0.77238	4.14676	0	0.228925	984	348
NM_001083902	Slc12a8	6.52764	2.27468	0.378133	0.0272655	0	1048	316
NM_001102400	Dab2	5.50465	1.1869	1.05229	0.0177412	0.248377	1928	850
NM_001103156	Steap2	7.28457	na	na	na	na	8578	1681
NM_001103157	Steap2	7.28457	na	na	na	na	8578	1681
NM_001105245	Pcdh19	4.19463	0.606239	0.061324	0	0	5127	4989
NM_001105246	Pcdh19	4.18252	0.606239	0.061324	0	0	5127	4989
NM_001105252	Tmc5	9.89345	na	1.03382	na	0.329944	422	245
NM_001109043	Zfp185	7.46881	na	0.371877	na	0	1871	1840
NM_001110146	Prg4	4.40062	2.41706	9.68985	0.91017	0.617587	572	118
NM_001111051	Dclk1	4.67132	0.370099	3.60939	1.3386	0.847641	5334	19
NM_001111052	Dclk1	4.67197	0.370099	3.60939	1.3386	0.847641	5441	126
NM_001111059	Cd34	3.19292	36.8741	4.39412	1.42724	1.31105	1498	443
NM_001111274	Igf1	5.67993	74.8048	73.1821	0.0469499	0.0817447	6347	194
NM_001111275	Igf1	5.40336	74.8048	73.1821	0.0469499	0.0817447	6313	160
NM_001111276	Igf1	5.65875	74.8048	73.1821	0.0469499	0.0817447	6313	160
NM_001111286	Omt2a	Inf	2.70589	2.93213	0	0	276	240
NM_001111316	Ptprc	3.05806	8.4622	4.40976	0.0096145	0	1645	1087
NM_001112697	Chrm1	4.72966	na	0.0659298	na	1.32388	4287	1059
NM_001113181	Gria4	4.53038	na	0.432023	na	0	557	526
NM_001113330	Crx	Inf	0.0189319	na	0	na	1833	551
NM_001113368	Ceacam2	5.58094	0.910403	0.394609	0.463536	2.19569	2024	1002
NM_001113369	Ceacam2	5.59951	0.910403	0.394609	0.463536	2.19569	2024	1002
NM_001113404	Tshr	13.6398	na	0.25637	na	0	516	111
NM_001113548	Adamtsl5	11.1346	0.839082	na	0	na	439	212
NM_001114332	Slc16a10	3.19199	0.104605	0.185485	0.378929	1.79991	3637	201
NM_001114333	Grm1	63.133	0.25527	0.0522277	0	1.80647	3844	1071
NM_001126331	Trp73	3.22554	1.04265	0.0385169	0.888824	0.514019	2742	709
NM_001128086	Anks1b	10.2883	0.0274147	0.449655	1.62885	0.0293487	3070	1545
NM_001130513	Ace2	11.7985	na	1.11806	na	0.909091	818	125
NM_001134459	Prickle2	4.8643	na	na	na	na	5054	57
NM_001134460	Prickle2	5.00264	na	na	na	na	5054	57
NM_001134461	Prickle2	4.94111	na	na	na	na	5054	57
NM_001136087	Slc6a18	Inf	na	1.17091	na	0.450524	2372	83
NM_001142965	Frrs1l	8.37876	na	na	na	na	2852	1550
NM_001143834	Grm5	16.3678	na	0.172802	na	0.378128	4194	3886
NM_001144992	2810459m11rik	37.4121	na	na	na	na	2367	1597
NM_001144993	2810459m11rik	37.4121	na	na	na	na	2367	1597
NM_001145192	Akain1	5.77687	0.0220811	na	0	na	1886	1862
NM_001145813	Elf5	6.85449	0.894958	0.216399	0	2.3534	1328	182
NM_001145830	Plcb1	6.67753	na	0.510671	na	0	2978	639
NM_001145953	Lgals3	5.219	49.3067	24.1796	0.0261292	0.0247446	487	117
NM_001146001	Pdzk1	4.83024	1.4343	5.25243	1.78174	0.845823	763	310
NM_001146200	Pik3cg	3.47329	3.80437	3.134	0.49428	0.272313	3181	1153
NM_001146201	Pik3cg	3.48091	3.80437	3.134	0.49428	0.272313	3181	1153
NM_001150749	Rdh7	10.7577	1.40029	0.718753	0.672326	0	524	90
NM_001159299	Itih4	49.5418	0.749508	0.569578	0	0	279	142
NM_001159317	Il1rap	3.34854	na	na	na	na	1925	429
NM_001159318	Il1rap	3.34854	na	na	na	na	2079	583
NM_001159415	Ces3b	24.9414	na	1.52341	na	0	329	306
NM_001159555	Cd36	8.98768	86.6127	7.53285	0.469477	0.78652	1660	179
NM_001159556	Cd36	8.98057	86.6127	7.53285	0.469477	0.78652	1660	179
NM_001159557	Cd36	8.9223	86.6127	7.53285	0.469477	0.78652	1660	179
NM_001159558	Cd36	9.08972	86.6127	7.53285	0.469477	0.78652	1660	179
NM_001159638	Them7	7.79419	na	0.104095	na	0	852	781
NM_001159706	Folh1	Inf	na	0.527472	na	0.607223	683	306
NM_001159904	Klrb1c	7.01477	0.238941	0.476647	0	0.756864	1800	238
NM_001159934	Oas1h	59.0942	8.02678	3.13737	0.134665	0	559	496
NM_001160096	Cldn10	3.63378	9.18785	0.718753	0.0602582	0	210	128
NM_001160097	Cldn10	3.62774	9.18785	0.718753	0.0602582	0	210	128
NM_001160098	Cldn10	3.62774	9.18785	0.718753	0.0602582	0	210	128
NM_001160099	Cldn10	3.84371	9.18785	0.718753	0.0602582	0	210	128
NM_001160139	Kcnq5	3.83076	0.0157744	na	0.438185	na	3760	476
NM_001160211	Cnih3	Inf	na	0.649196	na	0	1389	654
NM_001160212	Cnih3	Inf	na	0.649196	na	0	1389	654
NM_001160268	Plekha6	3.64354	1.44388	2.03097	1.44016	0.83172	3727	1511
NM_001160368	Rnf152	6.28732	na	na	na	na	7302	846
NM_001161714	Tgm1	3.99908	0.862002	4.38166	0	0	194	169
NM_001161715	Tgm1	3.99724	0.862002	4.38166	0	0	194	169
NM_001161742	Hsd3b3	9.019	na	0.738378	na	0	408	360
NM_001161743	Hsd3b3	9.019	na	0.738378	na	0	408	360
NM_001161744	Hsd3b3	8.35092	na	0.738378	na	0	408	360
NM_001161745	Hsd3b3	8.35092	na	0.738378	na	0	408	360
NM_001161796	Gucy1b3	4.3477	0.312461	0.863668	0	0	1267	1224
NM_001162368	Mgat4c	231.488	na	na	na	na	2105	862
NM_001162369	Mgat4c	231.488	na	na	na	na	2105	862
NM_001162500	Parvg	5.57475	2.67468	1.5558	0	0	1530	1494
NM_001162846	Phyhipl	3.01339	na	2.40432	na	0.470482	1561	369
NM_001163028	Bco1	7.65092	na	0.90323	na	0.466135	747	508
NM_001163032	Synpr	10.1325	0.996425	0.79871	0.548935	0	1488	1405
NM_001163155	Col4a5	3.88592	0.332592	na	2.32071	na	1111	464
NM_001163328	Ralyl	52.6108	na	na	na	na	1232	921
NM_001163329	Ralyl	Inf	na	na	na	na	1232	921
NM_001163330	Ralyl	Inf	na	na	na	na	1227	916
NM_001163504	Nr1h4	6.75497	1.73131	2.94201	0	0.253355	476	233
NM_001163516	Pex5l	9.51491	na	0.984195	na	0	1038	981
NM_001163517	Pex5l	9.30973	na	0.984195	na	0	1038	981
NM_001163554	Pou2f2	6.84776	0.768785	0.215242	0.0222504	0.0704597	1562	235
NM_001163555	Pou2f2	6.84776	0.768785	0.215242	0.0222504	0.0704597	1848	521
NM_001163556	Pou2f2	6.84776	0.768785	0.215242	0.0222504	0.0704597	1848	521
NM_001163566	Crb2	7.33953	0.922163	0.0707522	5.12821	32.5926	2431	2335
NM_001163587	Etnppl	8.1839	na	na	na	na	1073	434
NM_001163633	Wnt7b	8.92884	2.07066	1.97386	0.844128	1.22475	1952	978
NM_001163634	Wnt7b	9.06338	2.07066	1.97386	0.844128	1.22475	1952	978
NM_001163640	Chn2	5.16564	0.814328	0.992717	1.17601	0.173728	1568	51
NM_001163700	Nr1h4	6.81992	1.73131	2.94201	0	0.253355	476	233
NM_001163815	Vav1	3.20498	8.8693	16.0601	0.0259121	0	1532	248
NM_001163816	Vav1	3.19677	8.8693	16.0601	0.0259121	0	1532	248
NM_001164155	Tnfrsf19	5.65079	0.195684	0.173492	8.11447	1.10652	2623	107
NM_001164186	Barhl1	12.081	0.550143	0.848265	0.797157	0.0183346	1948	654
NM_001164210	Sptssb	16.2479	1.4496	4.87792	0	0.34892	1333	458
NM_001164369	Bcas1	5.18314	na	0.112431	na	3.83963	1083	104
NM_001164401	Ptpro	4.48619	3.7284	0.98843	0.0042996	0	2537	1121
NM_001164402	Ptpro	3.93812	3.7284	0.98843	0.0042996	0	2537	1121
NM_001164403	Ptpro	3.66122	3.7284	0.98843	0.0042996	0	2537	1121
NM_001164491	Ablim3	5.37998	11.6285	0.282457	0.771349	3.41638	1902	171
NM_001164523	Omt2a	Inf	2.70589	2.93213	0	0	276	240
NM_001164557	Pdzk1ip1	8.57806	19.3561	28.3935	0	0	346	314
NM_001164558	Pdzk1ip1	8.62094	19.3561	28.3935	0	0	346	314
NM_001164567	Vill	167.352	2.35227	1.56413	0	0	278	79
NM_001164634	Slc22a8	91.1921	na	na	na	na	1558	405
NM_001164635	Slc22a8	91.1921	na	na	na	na	1558	405
NM_001164696	Klk6	27.778	2.73304	8.54811	0	0.215814	380	140
NM_001164697	Klk6	27.778	2.73304	8.54811	0	0.215814	380	140
NM_001164698	Klk6	29.9599	2.73304	8.54811	0	0.215814	380	140
NM_001164742	Serpina1f	Inf	na	na	na	na	1688	91
NM_001164763	Rarres1	6.15369	33.6092	18.994	0.24632	0.299167	451	366
NM_001164767	Robo3	5.77687	1.84958	2.38519	0	0.0992647	343	258
NM_001166009	Tmem215	3.2151	na	na	na	na	1021	627
NM_001166372	43160	3.66786	0.868283	0.329919	0	0.252066	3107	1897
NM_001166375	43160	3.59732	0.868283	0.329919	0	0.252066	3107	1897
NM_001166580	8430408g22rik	4.19539	92.6272	32.6462	0.797827	0.831182	532	176
NM_001167578	Tcp10c	3.99116	0.536206	0.0792326	0	0.97318	847	64
NM_001167705	Serpina3a	94.6995	4.34571	na	0.356141	na	378	290
NM_001167920	Slc8a3	24.2594	na	0.0483776	na	5.31064	1576	871
NM_001168223	Clec2g	4.03116	1.81595	0.161001	0.686177	1.98413	1620	108
NM_001168224	Clec2g	3.8852	1.81595	0.161001	0.686177	1.98413	1620	108
NM_001168509	Ffar2	6.27989	na	1.00254	na	0	764	91
NM_001168510	Ffar2	6.54712	na	1.00254	na	0	764	91
NM_001168511	Ffar2	6.54712	na	1.00254	na	0	764	91
NM_001168512	Ffar2	6.10545	na	1.00254	na	0	764	91
NM_001168564	Kcns3	3.40996	na	0.185106	na	2.22295	1019	481
NM_001168615	Tifab	8.54364	0.913072	0.545956	0.535497	0.138952	2482	625
NM_001168624	C2cd4c	6.07947	0.0262219	0.0232481	0.224208	0	5198	1337
NM_001168643	Slc6a18	Inf	na	1.17091	na	0.450524	2398	109
NM_001168644	Slc6a18	Inf	na	1.17091	na	0.450524	2398	109
NM_001168645	Slc6a18	Inf	na	1.17091	na	0.450524	2398	109
NM_001168646	Slc6a18	Inf	na	1.17091	na	0.450524	2372	83
NM_001168679	Tspan8	6.97426	12.1781	16.9668	0	0	497	220
NM_001168680	Tspan8	7.06547	12.1781	16.9668	0	0	497	220
NM_001170332	Clec4a2	3.50739	2.22543	0.263073	0	0	1492	8
NM_001170333	Clec4a2	3.50739	2.22543	0.263073	0	0	1492	8
NM_001170855	Trim36	4.05399	na	0.178098	na	2.41022	2113	97
NM_001170866	Ncald	5.38458	0.0243817	0.216166	0	1.22769	2653	833
NM_001170867	Ncald	5.59149	0.0243817	0.216166	0	1.22769	2653	833
NM_001170868	Ncald	5.59149	0.0243817	0.216166	0	1.22769	2653	833
NM_001170912	Trim66	4.3595	na	na	na	na	4974	198
NM_001170913	Trim66	4.3595	na	na	na	na	5026	250
NM_001170978	Abat	6.10609	3.57069	0.546468	1.08661	1.71677	2941	946
NM_001171187	Mal	14.9897	2.55624	9.88123	0.491798	0.442319	1754	147
NM_001172091	1700001c19rik	3.50739	na	0.118849	na	8.0388	828	175
NM_001174054	Camk2b	3.01326	4.48325	3.59825	1.04226	0.914638	2161	247
NM_001177349	Ifi213	8.1839	1.54463	1.96487	0.890137	0	1957	207
NM_001177350	Ifi213	8.1839	1.54463	1.96487	0.890137	0	1957	207
NM_001177396	Anks1b	8.70352	0.0274147	0.449655	1.62885	0.0293487	3070	1545
NM_001177397	Anks1b	9.14046	0.0305784	0.194292	1.46033	0.0679222	5943	4418
NM_001177398	Anks1b	11.0232	0.0274147	0.449655	1.62885	0.0293487	3070	1545
NM_001177438	Aldh3b2	4.7012	21.8279	11.8011	0.0489378	0.0601891	473	388
NM_001177503	Plekhd1	15.7832	na	na	na	na	1731	1656
NM_001177616	Arpp21	3.23049	1.69354	1.18538	0	0	674	506
NM_001177618	Arpp21	3.2546	1.69354	1.18538	0	0	674	506
NM_001177696	Ablim2	4.47247	2.61168	0.443392	0.334678	0	1560	703
NM_001177697	Ablim2	4.45593	2.61168	0.443392	0.334678	0	1560	703
NM_001177698	Ablim2	4.49836	2.61168	0.443392	0.334678	0	1560	703
NM_001177699	Ablim2	4.45593	2.61168	0.443392	0.334678	0	1560	703
NM_001177700	Ablim2	4.38975	2.61168	0.443392	0.334678	0	1560	703
NM_001177713	Cyp26b1	8.71975	na	na	na	na	2853	290
NM_001177772	Slco1c1	Inf	na	na	na	na	649	78
NM_001177810	Rapgef3	6.17968	11.4611	1.91936	1.39931	1.25368	778	594
NM_001177811	Rapgef3	6.17968	11.4611	1.91936	1.39931	1.25368	778	594
NM_001177900	Rd3	7.90149	7.64996	6.85073	0.0407547	0.119493	2979	1086
NM_001177977	Acsm2	3.63427	na	0.877547	na	0.0112061	4685	592
NM_001177978	Acsm2	3.66146	na	0.877547	na	0.0112061	4685	592
NM_001190187	Nrg3	Inf	na	0.0104927	na	0	1582	1410
NM_001190188	Nrg3	Inf	na	0.0104927	na	0	1582	1410
NM_001190330	Ces2a	7.80752	5.91736	5.24628	0.157032	0.314064	218	47
NM_001190448	Ddc	3.23154	4.14264	2.31438	1.04926	1.3321	417	182
NM_001190703	Dlk1	114.282	12.6757	5.30027	0.00263932	0.0251827	2976	262
NM_001190704	Dlk1	115.076	12.5269	5.27742	0.00267068	0.0252917	2976	262
NM_001190705	Dlk1	100.311	12.4709	4.88304	0.00268267	0.0273345	2976	262
NM_001190885	Kcnip1	29.4231	3.66209	2.45367	0	0	1210	764
NM_001190886	Kcnip1	99.9605	3.66209	2.45367	0	0	1210	764
NM_001195006	Ndrg4	6.00723	4.29591	0.188085	0.0689211	0	1787	1557
NM_001195538	Dclk1	4.34339	0.370099	3.60939	1.3386	0.847641	5334	19
NM_001195539	Dclk1	4.67132	0.370099	3.60939	1.3386	0.847641	5334	19
NM_001198785	Aatk	3.456	2.67052	0.232538	0.534286	1.48364	1086	911
NM_001198787	Aatk	3.456	2.67052	0.232538	0.534286	1.48364	1086	911
NM_001199015	Slc7a9	17.4139	1.74611	na	0	na	139	104
NM_001199016	Slc7a9	17.3523	1.74611	na	0	na	139	104
NM_001199301	Cacng5	3.17212	na	0.287091	na	1.24346	2747	1845
NM_001204129	C1qtnf1	3.9747	7.4753	3.51583	0.782028	0.381481	3431	445
NM_001204130	C1qtnf1	4.02323	7.4753	3.51583	0.782028	0.381481	3431	445
NM_001204134	C1qtnf3	14.4603	0.517201	3.19284	0.474988	0.218292	1487	1025
NM_001204201	Spp1	9.22572	18.2394	65.9524	0.452555	0.428911	435	292
NM_001204202	Spp1	9.22572	18.2394	65.9524	0.452555	0.428911	435	292
NM_001204203	Spp1	9.22572	18.2394	65.9524	0.452555	0.428911	435	292
NM_001204233	Spp1	9.01322	18.2394	65.9524	0.452555	0.428911	435	292
NM_001204239	Clec1b	13.6955	3.49991	3.10299	0.243214	0.324286	162	82
NM_001204253	Clec1b	14.9649	3.0583	2.59095	0.278333	0.388372	307	227
NM_001204333	Cyp4f14	45.9857	1.06339	1.88559	0	0	431	377
NM_001204334	Cyp4f14	45.9857	1.06339	1.88559	0	0	431	377
NM_001204335	Cyp4f14	47.8564	1.06339	1.88559	0	0	431	377
NM_001204336	Cyp4f14	47.8564	1.06339	1.88559	0	0	431	377
NM_001205075	Pnoc	86.8078	1.97386	0.328126	0.490256	1.27	1103	282
NM_001205098	Mgat4c	231.488	na	na	na	na	2105	862
NM_007377	Aatk	3.456	2.67052	0.232538	0.534286	1.48364	1086	911
NM_007407	Adcyap1r1	12.0186	0.0410106	0.0363597	0.164439	0.493316	4284	918
NM_007413	Adora2b	3.23759	0.0216597	1.38264	0	0.297052	727	384
NM_007423	Afp	20.752	1.05306	0.311213	0	0	191	139
NM_007428	Agt	9.45522	7.47899	6.57264	0.401467	0.664232	343	154
NM_007470	Apod	4.82748	38.4143	22.5136	0.0425709	0.0124955	1149	219
NM_007473	Aqp7	4.41891	13.8244	2.64804	0.529244	0.610714	1172	52
NM_007519	Baat	3.83076	0.756646	3.09064	0	0.208706	402	246
NM_007543	Ceacam2	5.59951	0.885158	0.383667	0.476756	2.25832	2144	1122
NM_007576	C4bp	21.0443	3.97601	1.85869	0.335829	0.636917	285	149
NM_007592	Car8	6.05785	9.51286	17.108	0.132412	0.0996909	4724	417
NM_007595	Camk2b	3.01326	4.48325	3.59825	1.04226	0.914638	2161	247
NM_007602	Capn5	4.30117	8.00816	2.09423	1.09218	1.3702	2308	211
NM_007643	Cd36	8.98768	86.6127	7.53285	0.469477	0.78652	1660	179
NM_007646	Cd38	5.10859	8.60094	2.9087	1.1036	0.933057	2031	192
NM_007655	Cd79a	9.02328	7.63718	0.705318	0.131514	0	653	314
NM_007676	Psg16	12.7435	0.0906163	0.0401698	0	0	670	217
NM_007698	Chrm1	4.72966	na	0.0659298	na	1.32388	4287	1059
NM_007702	Cidea	3.09618	2.78663	5.14708	0	0	271	249
NM_007703	Elovl3	8.65628	2.21398	0.970663	0.715308	0	892	505
NM_007722	Ackr3	3.07216	6.74782	1.60662	0.0954314	0.355356	1379	815
NM_007729	Col11a1	99.376	na	0.666078	na	0.667037	1499	276
NM_007735	Col4a4	13.8959	na	na	na	na	2408	281
NM_007736	Col4a5	3.95254	0.332592	na	2.32071	na	1111	464
NM_007740	Col9a1	4.8011	na	0.710036	na	0.182863	877	722
NM_007756	Cplx1	11.0618	1.62329	0.872952	1.62635	1.02741	1575	655
NM_007770	Crx	Inf	0.0189319	na	0	na	1833	551
NM_007789	Ncan	10.8697	0.882127	0.0363761	0.781127	0	3235	2082
NM_007818	Cyp3a11	10.05	4.66216	0.474329	1.20311	0.327634	460	201
NM_007819	Cyp3a13	4.3895	2.4341	18.0674	0.75075	0.204195	1336	305
NM_007823	Cyp4b1	5.29547	31.2589	1.00625	0	0	317	296
NM_007824	Cyp7a1	Inf	1.43365	0.33406	2.89227	2.53956	2600	2173
NM_007843	Defb1	4.36138	17.8902	8.1012	0.563919	1.05174	609	87
NM_007876	Dpep1	3.31467	5.36902	0.0602547	0.496125	0	754	166
NM_007878	Drd4	19.6803	0.152858	na	0	na	140	94
NM_007903	Edn3	23.6749	0.184298	na	0	na	2124	702
NM_007934	Enpep	8.36425	2.44715	2.91776	0	0	1102	663
NM_007937	Epha5	3.2268	na	na	na	na	4279	1250
NM_007972	F10	6.50977	1.9414	2.38323	0.111003	0.0534459	334	18
NM_008008	Fgf7	15.491	na	na	na	na	1624	964
NM_008013	Fgl2	5.48239	4.02155	4.83319	0.575655	0.654875	2426	563
NM_008082	Galr1	5.26108	na	na	na	na	1197	893
NM_008090	Gata2	13.0942	2.88552	1.39542	0.815802	1.30868	1538	998
NM_008096	Gc	4.39354	na	7.83717	na	0	178	149
NM_008100	Gcg	5.24281	8.22442	7.38892	0.69	0.834677	448	200
NM_008151	Gpr12	Inf	0.533711	na	0	na	956	356
NM_008245	Hhex	6.87306	3.11932	0.504529	0	0	926	855
NM_008261	Hnf4a	14.7173	0.00929541	0.354373	0	2.19693	2816	2299
NM_008285	Hrh1	11.4256	0.034328	na	0	na	2070	1178
NM_008299	Dnajb3	4.7983	4.52772	1.48177	1.05282	0.407455	218	18
NM_008308	Htr1a	Inf	na	na	na	na	2614	2574
NM_008382	Inhbe	5.19613	0.0165931	0.0147113	0	0	855	613
NM_008386	Ins1	81.839	2.14039	0.749073	0	0	508	76
NM_008392	Acod1	8.17221	1.38655	0.709701	0	0	1065	591
NM_008409	Itm2a	4.83488	12.2388	17.621	1.20817	0.848536	696	128
NM_008424	Kcne1	20.109	na	na	na	na	2564	133
NM_008428	Kcnj8	9.15818	11.7789	0.354003	0.340607	0.132209	666	236
NM_008429	Kcnj9	16.0755	0.122149	0.433186	6.74467	0	1830	783
NM_008522	Ltf	80.6619	5.44254	2.35381	0	0	584	136
NM_008527	Klrb1c	7.01477	0.238941	0.476647	0	0.756864	1800	238
NM_008536	Tm4sf1	7.45904	177.825	14.763	0.0784835	0.0847928	692	274
NM_008579	Meig1	3.20625	2.32273	1.21687	0.148072	0	152	86
NM_008585	Mep1a	3.18122	3.00122	12.2549	0.340972	0.901865	624	380
NM_008600	Mip	137.568	0.756646	0.167709	0.15887	0.953222	1307	174
NM_008605	Mmp12	5.00127	0.848109	0.751926	0	0	2134	354
NM_008614	Mobp	Inf	na	na	na	na	2901	424
NM_008713	Nos3	4.43581	4.11902	4.60456	0.293913	0.786724	495	345
NM_008734	Nrg3	Inf	na	0.0104927	na	0	1582	1410
NM_008736	Nrl	3.13136	na	0.250275	na	0.296176	1577	1034
NM_008759	Sebox	Inf	na	0.293632	na	0.405553	676	507
NM_008766	Slc22a6	Inf	na	0.635529	na	0.140819	2088	289
NM_008769	Otc	Inf	na	na	na	na	1122	134
NM_008770	Cldn11	34.7816	na	na	na	na	1018	313
NM_008792	Pcsk2	12.9728	1.93461	0.514562	0	0	2471	217
NM_008855	Prkcb	4.86936	5.68341	1.59362	0.5033	0.470659	6587	1167
NM_008865	Prl3b1	Inf	1.24191	na	0	na	208	140
NM_008895	Pomc	20.3793	28.1751	53.6669	0	0	150	108
NM_008938	Prph2	3.03974	na	0.626847	na	0	1379	397
NM_008984	Ptprm	3.3575	0.806262	0.549866	0.552036	0.358824	780	678
NM_009036	Rbpjl	8.35092	na	na	na	na	805	148
NM_009038	Rcvrn	12.9928	2.14051	4.28099	0	0	362	340
NM_009040	Rdh16	8.00404	0.12699	0.0844409	0.179288	1.67335	2209	1212
NM_009060	Rgn	10.2582	3.07788	0.938034	0.442146	0.720296	602	185
NM_009062	Rgs4	4.04438	19.4498	90.8383	1.0918	1.02605	2204	235
NM_009065	Rit2	65.4712	na	na	na	na	963	298
NM_009108	Nr1h4	6.81992	1.73131	2.94201	0	0.253355	476	233
NM_009115	S100b	11.5825	0.393956	1.77966	0	0	1251	1069
NM_009129	Scg2	39.4082	na	3.61362	na	0.509381	482	318
NM_009139	Ccl6	9.791	107.822	46.6872	0.108153	0.216376	939	429
NM_009144	Sfrp2	3.84142	1.52109	na	0.0242652	na	892	277
NM_009154	Sema5a	3.20845	0.619903	0.0161647	0.858473	10.5163	6926	1125
NM_009158	Mapk10	3.86712	na	na	na	na	5368	948
NM_009178	St3gal4	9.91874	10.9194	2.31504	0.755929	0.938468	854	678
NM_009196	Slc16a1	6.44504	6.02894	5.26742	0	0	2740	1536
NM_009199	Slc1a1	26.49	na	na	na	na	2060	738
NM_009209	Slc6a2	11.7407	na	0.787289	na	0	4018	385
NM_009216	Sstr1	8.84154	na	0.190563	na	0	2268	1253
NM_009243	Serpina1a	3.5279	na	0.156615	na	0	216	65
NM_009253	Serpina3m	9.00229	na	0.150187	na	0	330	73
NM_009257	Serpinb5	6.01839	5.42615	7.97787	0.00671482	0	1355	109
NM_009263	Spp1	9.22572	18.2394	65.9524	0.452555	0.428911	435	292
NM_009307	Syt2	7.38013	0.0182324	na	0	na	1736	1038
NM_009308	Syt4	62.3536	na	0.344019	na	2.24492	2375	160
NM_009324	Tbx2	9.13869	1.52399	na	0.292412	na	934	119
NM_009348	Tectb	Inf	1.00754	0.472913	0	0.143607	1605	716
NM_009411	Tpbpa	Inf	na	na	na	na	914	255
NM_009463	Ucp1	82.1313	na	0.513395	na	0	485	81
NM_009467	Ugt2b5	23.8836	na	1.29181	na	1.49558	266	16
NM_009470	Umod	5.66515	3.57236	0.725823	0.353009	0.513468	351	243
NM_009474	Uox	293.451	0.388245	4.40595	0	0	876	802
NM_009509	Vil1	4.14189	7.4012	9.32473	1.02233	0.770803	569	527
NM_009528	Wnt7b	8.82161	2.07066	1.97386	0.844128	1.22475	1952	978
NM_009549	Zfp185	7.46881	na	0.371877	na	0	1871	1840
NM_009598	Ace	19.1775	2.86833	1.70997	0.303512	0.367788	930	226
NM_009612	Acvrl1	3.23759	7.7454	1.90372	0.274429	0.0560323	1859	161
NM_009626	Adh7	97.9146	2.36074	1.52951	0.92849	0.021535	836	225
NM_009661	Alox8	4.35718	0.418727	6.95585	0	0.10595	1205	850
NM_009700	Aqp4	12.73	0.264459	0.195389	1.37028	1.59042	4057	236
NM_009801	Car2	7.32965	15.957	10.4611	0.659939	0.456161	680	486
NM_009827	Cckar	303.389	0.947476	1.06482	0	0	1271	1144
NM_009845	Cd22	8.65886	2.22916	0.0241019	0	0	1127	703
NM_009848	Entpd1	4.14926	2.903	1.92258	0.36693	0.741731	2573	442
NM_009850	Cd3g	3.11046	21.8057	8.16096	0.309321	0.521387	346	171
NM_009885	Cel	25.6996	5.2451	3.1653	0	0	238	199
NM_009912	Ccr1	10.0545	2.37604	2.08008	0	0.422646	1298	451
NM_009922	Cnn1	85.3464	6.88324	3.39034	0.173567	0	990	496
NM_010003	Cyp2c39	Inf	na	0.540271	na	0	335	265
NM_010007	Cyp2j5	11.9251	na	0.484942	na	0	2036	319
NM_010016	Cd55	5.00146	4.78602	5.8193	0.412597	0.709776	1282	98
NM_010050	Dio2	4.09786	0.0119881	na	0	na	4860	3208
NM_010051	Dkk1	26.2155	1.05229	0.832992	0	0.635121	1301	350
NM_010052	Dlk1	107.42	11.2827	4.17952	0.00296519	0.0319355	2976	262
NM_010103	Edil3	4.56776	na	na	na	na	3405	2716
NM_010125	Elf5	6.85164	0.894958	0.216399	0	2.3534	1328	182
NM_010142	Ephb2	6.37025	0.514546	0.508829	1.83269	0.880231	1712	1038
NM_010157	Esr2	41.2118	1.26857	0.478599	0	0.320015	1311	654
NM_010170	F2rl2	3.5477	2.98	0.136657	0	0	1210	1163
NM_010186	Fcgr1	Inf	0.855505	0.202262	0.0404163	0.0757807	1367	54
NM_010196	Fga	Inf	na	1.2197	na	0	1624	258
NM_010208	Fgr	8.35387	3.81211	1.48506	0.228514	0.730093	1539	184
NM_010250	Gabra1	13.9126	na	0.271961	na	3.26561	1999	798
NM_010271	Gpd1	12.3419	5.41177	0.299877	1.19644	0.940551	1720	507
NM_010291	Gjb5	23.1488	na	na	na	na	725	335
NM_010293	Gykl1	Inf	0.0124108	0.0110033	0	0	222	179
NM_010299	Gm2a	11.6266	54.0877	26.428	0.990986	0.999366	1365	936
NM_010314	Gngt1	Inf	1.43553	0.318183	0.0297227	0	656	124
NM_010317	Gng4	9.36927	0.862842	11.0041	0.387716	0.248924	2520	213
NM_010327	Gp1bb	5.57403	na	1.00276	na	0	403	252
NM_010338	Gpr37	3.52114	3.52637	na	0.715226	na	518	50
NM_010356	Gsta3	6.2139	3.50641	2.12704	0	0	597	249
NM_010362	Gsto1	23.0613	40.8382	23.6171	0.983405	0.911447	338	65
NM_010403	Hao1	34.3432	na	0.827931	na	0.896136	896	245
NM_010449	Hoxa1	11.1067	0.0302659	na	0	na	1367	1144
NM_010474	Hs3st1	16.522	8.04512	3.9989	0.0430765	0.0384172	428	297
NM_010491	Iapp	21.1725	57.1237	26.5285	1.07378	1.10167	315	43
NM_010512	Igf1	5.42409	74.8048	73.1821	0.0469499	0.0817447	6347	194
NM_010574	Irx2	16.5959	0.0389355	0.138079	0	0	931	507
NM_010604	Kcnj16	56.5636	0.0697523	0.874619	0	0	2194	1018
NM_010671	Krtap13	15.7832	na	na	na	na	260	43
NM_010696	Lcp2	4.73445	5.31402	3.72256	0.0417149	0.100311	1593	569
NM_010704	Lepr	6.62506	1.66093	0.981711	0	0.205	176	76
NM_010705	Lgals3	5.219	49.3067	24.1796	0.0261292	0.0247446	487	117
NM_010714	Lhx9	4.67652	0.0318812	na	0	na	3468	655
NM_010733	Lrrn3	5.09156	na	2.00708	na	0	525	473
NM_010762	Mal	15.9845	2.55624	9.88123	0.491798	0.442319	1754	147
NM_010770	Matn3	Inf	na	0.475233	na	0	1453	918
NM_010919	Nkx2-2	Inf	na	0.0625975	na	5.35833	843	723
NM_010930	Nov	16.8888	8.91762	2.41296	0.909874	0.897979	1256	95
NM_010932	Pnoc	87.1001	1.70712	0.425677	0.566858	0.978955	1189	368
NM_011082	Pigr	8.58683	6.7453	11.6486	0.673043	0.491429	1353	678
NM_011109	Pla2g2d	3.66267	8.95078	13.31	0.564115	0.197933	1750	734
NM_011113	Plaur	12.1867	7.56646	3.45966	0.379747	0.257718	402	244
NM_011138	Pou2f2	6.84776	0.768785	0.215242	0.0222504	0.0704597	1848	521
NM_011168	Prl7a2	Inf	na	na	na	na	473	100
NM_011177	Klk6	28.1358	2.73304	8.54811	0	0.215814	380	140
NM_011210	Ptprc	3.07226	8.4622	4.40976	0.0096145	0	1645	1087
NM_011212	Ptpre	3.83662	2.82314	0.578723	1.13971	0.166388	2988	1316
NM_011216	Ptpro	4.73089	3.7284	0.98843	0.0042996	0	2537	1121
NM_011271	Rnase1	13.3527	57.2859	52.8353	0.0495309	0.0627622	444	268
NM_011283	Rp1	40.335	0.0038208	0.125337	0	0	1093	449
NM_011286	Rph3a	172.563	0.953028	0.537693	0.619862	1.3637	1668	131
NM_011333	Ccl2	3.89195	34.0491	25.6709	0.857143	0.725727	274	99
NM_011338	Ccl9	6.0941	90.1966	64.5892	0.0447758	0.0609625	2467	719
NM_011339	Cxcl15	43.4916	3.27261	na	0	na	1586	420
NM_011347	Selp	14.1698	23.6074	0.115	0.727651	3.94144	1007	119
NM_011348	Sema3e	4.57407	1.13784	0.601205	0.0419636	0.140827	3899	1522
NM_011356	Frzb	31.4602	0.157635	0.66773	0	0.436805	1392	1185
NM_011384	Six6	15.1987	na	1.47893	na	0.179398	3104	525
NM_011392	Slc34a1	5.59512	0.156332	0.415807	0	0.578947	1058	222
NM_011437	Sox10	15.553	1.12258	0.0775533	0	0	1025	853
NM_011441	Sox17	39.1658	19.8775	0.771016	0.237291	0.564979	788	326
NM_011458	Serpina3k	6.37707	na	0.070863	na	1.27354	318	95
NM_011459	Serpinb8	7.02441	2.80036	5.87103	0.544734	0.145227	1653	284
NM_011567	Tead4	4.91841	3.14417	na	0	na	1223	182
NM_011594	Timp2	3.03114	41.8893	29.5918	0.513853	0.323392	2638	106
NM_011613	Tnfsf11	4.24704	1.66093	1.21868	0	1.22831	1130	767
NM_011642	Trp73	3.01948	1.04265	0.0385169	0.888824	0.514019	2742	709
NM_011648	Tshr	8.60145	0.217941	0.0594537	0.165062	0	1925	1294
NM_011661	Tyr	36.243	na	na	na	na	1644	234
NM_011674	Ugt8a	12.2759	0.880056	na	1.6976	na	1873	384
NM_011683	Vmn1r51	Inf	na	na	na	na	552	245
NM_011691	Vav1	3.21302	8.8693	16.0601	0.0259121	0	1532	248
NM_011700	Vill	255.162	2.35227	1.56413	0	0	278	79
NM_011702	Vip	Inf	3.45064	0.331732	1.02077	0.522989	813	465
NM_011704	Vnn1	24.3092	2.25704	2.97302	0.997888	0.987728	689	175
NM_011731	Slc6a20b	4.22386	2.01134	0.63687	0.69485	0.439325	1173	166
NM_011838	Lynx1	19.1745	0.179995	0.620597	1.29371	0.998007	3375	938
NM_011889	43346	6.00802	0.706203	na	0	na	3569	1214
NM_011998	Chst4	9.9376	na	0.704984	na	0	739	660
NM_011999	Clec4a2	3.50739	2.22543	0.263073	0	0	1492	8
NM_012028	St6galnac5	Inf	1.07164	na	1.45863	na	801	467
NM_012054	Aoah	3.9404	0.0458573	na	0	na	915	366
NM_013462	Adrb3	5.99179	na	na	na	na	753	504
NM_013464	Ahr	3.58218	3.36014	1.79305	0.512321	1.08874	2710	2143
NM_013473	Anxa8	12.906	4.22153	3.43599	0.997198	1.67195	818	268
NM_013504	Dsc1	3.572	na	0.686082	na	1.06595	1049	306
NM_013510	Epb41l1	4.61073	0.966911	0.367395	0.661074	0.319788	3396	484
NM_013515	Stom	7.1452	10.6865	1.67295	1.27797	1.44187	1871	1020
NM_013526	Gdf6	8.63856	1.60203	0.00706639	0	17.4724	2061	1898
NM_013532	Lilrb4a	23.8077	1.02867	4.07366	1.35497	0	367	253
NM_013540	Gria2	Inf	0.00577446	0.0102392	0	0	3779	3682
NM_013542	Gzmb	Inf	1.88545	0.65554	0.132299	0	561	470
NM_013555	Hoxd9	Inf	4.26884	0.460574	0	0	787	763
NM_013568	Kcna6	3.77085	0.119249	0.0932868	0	0.465695	3120	1646
NM_013569	Kcnh2	3.42124	0.0422707	0.224861	0	0	411	387
NM_013580	Ldhc	55.4501	na	na	na	na	265	115
NM_013601	Msx2	7.68285	na	na	na	na	1288	277
NM_013628	Pcsk1	4.04185	na	0.203284	na	1.22981	179	18
NM_013697	Ttr	5.36799	10.3925	5.49601	0	0	588	141
NM_013701	Ugt1a2	6.13734	7.23673	7.89309	0	0	1578	574
NM_013708	Nr2e3	12.8604	na	1.02679	na	0.054902	616	259
NM_013723	Podxl	7.33363	3.38424	0.0691346	1.9481	4.63762	3529	2713
NM_013732	Cartpt	70.6154	8.21697	1.27489	0.0171584	0.24512	435	113
NM_013751	Hrasls	5.51161	na	na	na	na	2296	139
NM_013806	Abcc2	6.29071	na	3.24404	na	0.557789	661	205
NM_013823	Kl	6.29898	0.0115636	0.0615132	5.80769	0.967949	1963	1625
NM_013851	Abca8b	3.11768	na	na	na	na	1104	237
NM_013869	Tnfrsf19	5.867	0.195684	0.173492	8.11447	1.10652	2623	107
NM_013874	Dpf1	8.1839	0.608019	na	0	na	1035	377
NM_013892	Pcsk1n	20.6546	1.46223	0.864267	0	0.019784	1307	130
NM_013900	Mfi2	8.66137	0.0243817	1.5564	53.0876	0.464244	1798	851
NM_013905	Heyl	4.21929	5.36584	11.7192	0.425378	0.568522	3240	893
NM_015745	Rbp3	Inf	na	na	na	na	1496	578
NM_015756	Shroom3	3.28451	0.896649	2.13384	0.343653	0.298731	1035	593
NM_015767	Ttpa	19.5563	na	0.546294	na	0	2204	1889
NM_015826	Dmrt1	53.1954	na	0.607222	na	0.879899	978	300
NM_016672	Ddc	3.2116	4.14264	2.31438	1.04926	1.3321	417	182
NM_016674	Cldn1	3.29669	13.5913	16.4013	1.02028	0.928859	2392	318
NM_016751	Clec4f	230.903	4.23209	1.59181	0	0	669	194
NM_016770	Folh1	Inf	na	0.527472	na	0.607223	683	306
NM_016771	Sult1d1	4.46317	0.797469	4.44418	0	0.510666	1287	684
NM_016867	Gipc2	3.36418	17.1709	19.4908	0.511328	0.360416	306	200
NM_016894	Ramp1	5.66206	7.08858	10.4862	0.0463178	0.0214505	1835	314
NM_016911	Srpx	3.5909	0.935181	0.489936	0	0	940	350
NM_016917	Slc40a1	10.1325	2.5782	3.82625	1.27292	1.47019	1336	91
NM_016976	Grm1	63.133	0.275529	0.0563728	0	1.67364	2904	131
NM_016984	Trpc4	Inf	na	na	na	na	311	260
NM_017466	Ccrl2	3.1704	18.7829	9.14446	0.315157	0.375084	511	24
NM_017469	Gucy1b3	4.3477	0.312461	0.863668	0	0	1251	1208
NM_017473	Rdh7	10.7577	1.40029	0.718753	0.672326	0	524	90
NM_018746	Itih4	49.5418	0.749508	0.569578	0	0	279	142
NM_018826	Irx5	6.66404	na	0.399235	na	1.19077	560	306
NM_018830	Asah2	4.78406	na	1.84413	na	0.362701	2107	61
NM_019423	Elovl2	7.98769	2.93096	1.54117	0	0.114546	2912	2798
NM_019432	Tmem37	4.50508	22.6427	19.3211	0	0	333	186
NM_019446	Barhl1	12.081	0.550143	0.848265	0.797157	0.0183346	1948	654
NM_019487	Hebp2	3.47152	4.23142	5.53966	0	0.26847	1011	375
NM_019498	Olfm1	9.28426	4.11957	0.678651	0	0	1008	956
NM_019510	Trpc3	6.05821	2.11536	na	0	na	773	694
NM_019517	Bace2	4.36878	12.9219	8.45079	0.123306	0.0798389	2117	208
NM_019535	Sh3gl2	4.30452	0.0455202	1.66812	0	0.767742	1626	1296
NM_019540	Pfpl	Inf	na	na	na	na	1615	702
NM_019541	Cts8	7.01477	na	0.486897	na	0.0728341	1407	272
NM_019545	Hao2	8.94988	2.82458	1.63915	0	0	790	386
NM_019546	Prodh2	Inf	0.297372	na	1.67766	na	420	56
NM_019577	Ccl24	9.35303	0.118535	na	0	na	858	214
NM_019626	Cbln1	6.37454	0.99365	0.646039	0.36007	0	1401	830
NM_019631	Tmem45a	7.9664	15.0738	17.0592	0	0.0117545	1522	418
NM_019656	Tspan6	5.56303	8.14047	16.1695	1.04203	0.565574	854	185
NM_019677	Plcb1	6.72249	na	0.449494	na	0	3206	867
NM_019697	Kcnd2	Inf	na	na	na	na	2463	58
NM_019741	Slc2a5	8.13076	na	na	na	na	937	524
NM_019807	Acpp	3.99907	1.95684	2.01251	0	0.373198	1458	279
NM_019810	Slc5a1	19.1581	1.38411	4.62807	0.0121752	0.33574	1697	350
NM_019948	Clec4e	5.81022	1.68802	0.689215	0	0.395485	1751	865
NM_019957	Dnase2b	Inf	na	na	na	na	901	356
NM_019959	C1qtnf1	4.02323	7.4753	3.51583	0.782028	0.381481	3431	445
NM_019978	Dclk1	4.34339	0.370099	3.60939	1.3386	0.847641	5334	19
NM_019984	Tgm1	3.93721	0.862002	4.38166	0	0	194	169
NM_019985	Clec1b	13.6398	3.49991	3.10299	0.243214	0.324286	162	82
NM_020047	Tacstd2	3.82992	25.816	78.1363	0.999295	1.06847	694	357
NM_020265	Dkk2	3.0992	0.0380437	0.618368	0	0.605497	2184	1539
NM_020272	Pik3cg	3.48177	3.80437	3.134	0.49428	0.272313	3181	1153
NM_020274	Htr3b	14.2634	na	0.080932	na	0	892	510
NM_020278	Lgi1	Inf	na	0.135408	na	0	2484	353
NM_020626	Tmem27	16.2217	1.2832	2.27535	1.05435	0.82005	507	356
NM_021291	Slc7a9	17.2908	1.74611	na	0	na	139	104
NM_021347	Gsdma	7.52537	20.8873	9.13239	0.0153932	0.0645088	1292	233
NM_021364	Clec5a	57.5212	na	4.88473	na	0.366987	3068	194
NM_021365	Xlr4b	3.07314	3.9546	2.38416	0.263908	0.3881	305	218
NM_021371	Caln1	5.06623	na	0.518688	na	0.676513	1235	260
NM_021375	Rhbg	6.35478	9.29594	4.60002	0	0	506	246
NM_021377	Sorcs1	6.87139	na	2.21892	na	0.0686895	3555	254
NM_021386	Cldn10	3.83297	9.18785	0.718753	0.0602582	0	210	128
NM_021390	Sall1	Inf	0.0268632	0.07145	0	1.54338	1134	404
NM_021400	Prg4	8.09411	2.41706	9.68985	0.91017	0.617587	572	118
NM_021427	Fam181b	4.67652	0.774022	na	1.99954	na	446	182
NM_021456	Ces1g	13.8481	0.813333	0.786648	0.78988	0	536	430
NM_021471	Slco1c1	Inf	na	na	na	na	649	78
NM_021472	Rnase4	3.90183	10.7464	20.8271	1.06628	0.927853	884	155
NM_021476	Cysltr1	15.1987	3.13971	0.288273	0.565808	0.607065	1303	1188
NM_021483	Pex5l	9.55089	na	0.984195	na	0	1038	981
NM_021486	Bco1	7.65092	na	1.26772	na	0.332113	460	221
NM_021509	Moxd1	3.32905	na	1.7785	na	1.34924	1154	265
NM_021517	Pdzk1	4.83833	1.4343	5.25243	1.78174	0.845823	763	310
NM_021890	Fads3	6.6105	4.66599	0.391321	0.477282	0	1735	308
NM_022029	Nrgn	14.3914	1.81233	3.21359	1.26754	0.375965	839	256
NM_022032	Perp	3.64924	138.277	183.865	1.02495	1.13039	1196	133
NM_022312	Tnr	14.5797	0.560479	0.124229	1.27511	0.971514	709	42
NM_022317	Slc28a3	11.3276	1.5595	0.153627	0.0367255	1.04668	2382	4
NM_022321	Parvg	5.68881	2.67468	1.5558	0	0	1530	1494
NM_022413	Trpv6	15.4685	na	na	na	na	449	156
NM_022434	Cyp4f14	45.674	1.06339	1.88559	0	0	431	377
NM_022723	Scube1	4.93897	2.42549	1.23883	0.162397	0.144975	4742	708
NM_022884	Bhmt2	Inf	na	na	na	na	966	807
NM_023113	Aspa	3.95705	na	na	na	na	448	196
NM_023118	Dab2	5.96871	1.1869	1.05229	0.0177412	0.248377	1928	850
NM_023125	Kng1	49.5161	0.972831	1.43751	1.73061	0.286445	502	111
NM_023134	Sftpa1	5.44507	26.8367	15.5647	0.32131	0.0906049	1927	29
NM_023256	Krt20	3.60679	17.8352	28.2525	1.04429	1.07534	578	266
NM_023333	2210010c04rik	46.7652	na	0.16496	na	0.191673	1367	94
NM_023395	Wfdc1	18.7061	na	2.41082	na	0	342	310
NM_023537	Rab3b	12.2351	3.4674	3.18141	0.0275836	0.0236923	2511	375
NM_023543	Chn2	5.22455	0.814328	0.992717	1.17601	0.173728	1568	51
NM_023557	Slc44a4	6.67274	0.676152	1.37022	0	0	200	113
NM_023631	Aox4	4.53917	1.89162	2.51564	1.84753	2.33184	783	114
NM_023727	Rd3	8.05366	7.64996	6.85073	0.0407547	0.119493	2779	886
NM_023729	Asz1	Inf	2.04978	1.07693	0.942474	0.265071	287	146
NM_023785	Ppbp	58.1057	3.62303	2.16328	1.41937	0.957978	653	216
NM_023814	Tbx18	3.32752	0.354678	na	0.926045	na	2421	555
NM_023852	Rab3c	3.73663	1.60989	1.6652	0	0.0637639	7627	235
NM_023872	Kcnq5	3.83076	0.0157744	na	0.438185	na	3760	476
NM_023878	Cldn10	3.63378	9.18785	0.718753	0.0602582	0	210	128
NM_023903	Lipm	7.33114	3.13952	3.72464	0.797546	0.693723	1291	738
NM_023907	Foxi1	78.2203	5.75308	5.46344	0.830128	0.742321	1169	380
NM_024246	Tmem79	4.34106	3.22086	1.8584	0.215743	0.0276257	1066	674
NM_024271	1700016d06rik	Inf	na	0.697404	na	1.50514	681	125
NM_024286	Popdc3	3.99842	2.70876	0.528343	0.327147	0.80071	470	137
NM_024435	Nts	110.368	40.7254	22.9663	0.0718269	0.221331	575	187
NM_025357	Smpx	8.1839	na	na	na	na	418	66
NM_025451	Camk2n1	4.5975	1.86673	0.397206	0.175314	0.385529	3338	841
NM_025466	Gkn1	272.797	1.07073	0.664507	0	0	622	114
NM_025467	Gkn2	Inf	5.64127	1.54808	0.38322	0.247619	191	86
NM_025572	2610528j11rik	4.38747	7.71779	2.27126	0	0	422	383
NM_025585	1700029f12rik	3.64493	20.1884	7.30202	0.333607	0.212008	587	314
NM_025622	Lgals2	15.8332	28.3296	13.7865	0.519737	0.0789065	147	110
NM_025655	Tmigd1	4.73982	8.24054	3.89951	0.467298	0.322557	557	445
NM_025721	Spesp1	Inf	na	0.0153159	na	0.863905	1696	175
NM_025749	Zfp474	7.94034	1.32859	0.603322	0.223338	0	510	357
NM_025760	Hacd4	3.7137	1.50942	0.463237	0	0	1334	308
NM_025768	Grtp1	3.53458	na	na	na	na	184	124
NM_025777	Duoxa2	7.32167	0.0561866	0.747218	14.5324	1.16259	488	210
NM_025809	Clec14a	3.87483	2.59384	na	0.120783	na	2735	344
NM_025968	Ptgr1	6.51372	10.6433	4.75987	0	0	1063	130
NM_026018	Pdzk1ip1	8.61728	19.3561	28.3935	0	0	346	314
NM_026092	Lyzl1	Inf	na	na	na	na	262	140
NM_026162	Plxdc2	4.459	4.92664	7.42954	0	0.200651	808	376
NM_026180	Abcg8	3.57431	2.89189	0.667324	0.0142845	0.274412	1534	435
NM_026208	1700019n19rik	Inf	na	1.14347	na	0.293333	193	133
NM_026243	Mgat4c	77.1625	na	na	na	na	2105	862
NM_026251	Patl2	3.13426	1.61694	0.827058	0.449231	0.973333	341	216
NM_026336	2310057j18rik	3.16639	na	3.15057	na	0	291	212
NM_026380	Rgs8	8.84026	na	na	na	na	4758	1046
NM_026385	Pllp	7.59934	1.56264	1.11806	0	0	1268	711
NM_026505	Bambi	4.2455	13.0463	5.36842	0	0.0308373	4004	357
NM_026571	Lhfpl5	10.6057	1.18949	na	0	na	270	183
NM_026593	D730048i06rik	4.12634	0.0995587	4.5458	0	0.262568	917	310
NM_026680	Golt1a	19.0401	na	0.489364	na	0	1376	287
NM_026687	Serpina1f	Inf	na	na	na	na	1688	91
NM_026701	Pbld1	7.52919	0.281397	0.207904	1.83333	3.1625	1075	371
NM_026743	Tspan11	4.18425	2.07325	na	0.171317	na	3179	367
NM_026793	Myct1	9.54789	7.38653	na	0.143092	na	2088	284
NM_026838	Srpx2	6.83105	0.77238	4.14676	0	0.228925	984	348
NM_026886	Srrm4	3.78248	na	na	na	na	5295	2060
NM_026972	Cd209b	Inf	na	0.636138	na	0.999448	1020	197
NM_027035	1700001l19rik	7.40448	4.52992	1.14748	0.275445	0.0370792	1222	276
NM_027153	Pir	3.67571	2.5071	6.18771	0	0.0431738	448	222
NM_027209	Ms4a6b	6.70001	4.33672	2.45935	0.140621	0.0488543	820	485
NM_027286	Ace2	12.012	na	1.11806	na	0.909091	818	125
NM_027301	Sdr9c7	4.39768	6.2361	7.14014	0.509811	0.533854	1797	419
NM_027363	Chp2	58.4565	5.09578	na	0.646628	na	364	240
NM_027398	Kcnip1	29.4231	3.66209	2.45367	0	0	1210	764
NM_027407	Ica1l	15.5584	na	na	na	na	2056	608
NM_027442	Ddo	4.55043	na	0.882679	na	1.31538	1890	1370
NM_027468	Cpm	7.99888	0.657001	4.17938	0.0641478	0.126955	3832	1139
NM_027562	Clec2g	3.65585	1.81595	0.161001	0.686177	1.98413	1620	108
NM_027664	Rimklb	4.15431	2.55026	2.72819	0.0224996	0.201386	2588	610
NM_027669	43355	Inf	0.433401	1.12073	0	0	1484	1023
NM_027741	Mro	6.26396	na	1.45373	na	0	1236	832
NM_027853	Mettl7b	84.1773	2.13641	na	0.100236	na	442	18
NM_027872	Slc46a3	6.15815	5.67485	4.70184	0.705882	0.881229	692	590
NM_027884	Tns1	5.9819	5.66739	1.29583	1.15058	0.881319	4299	616
NM_027907	Etnppl	8.1839	na	na	na	na	1073	434
NM_027948	1700003e16rik	11.1192	7.55012	0.405689	0	0	84	54
NM_027984	Epn3	4.18614	2.42554	6.77599	0	0.139389	1552	167
NM_028034	Tdrd12	47.9343	na	0.524432	na	0	190	169
NM_028052	Synpr	10.3438	0.996425	0.79871	0.548935	0	1488	1405
NM_028055	Btbd17	14.3413	0.942173	0.464068	2.83186	0	779	226
NM_028060	Slc35f2	4.31515	2.06512	4.44223	0	0	1190	1152
NM_028087	Gcnt3	35.909	na	0.0231057	na	0	2475	428
NM_028094	Ugt2a3	23.9671	0.158737	0.187646	0	0	480	134
NM_028238	Rab38	6.08969	na	2.58075	na	0	812	697
NM_028296	Car10	52.0262	na	0.569578	na	0	1413	931
NM_028408	Cnih3	Inf	na	0.649196	na	0	1389	654
NM_028550	1700074p13rik	Inf	na	na	na	na	532	115
NM_028572	Vgll3	3.42582	na	0.606869	na	0.0850312	2353	1183
NM_028589	1700125h20rik	20.752	2.64174	0.607222	0	0	183	146
NM_028610	Dppa4	Inf	1.30553	na	0	na	560	505
NM_028623	Cst6	3.51785	101.612	73.5461	0.00127491	0.000173519	3261	107
NM_028664	Ankrd45	17.1472	na	na	na	na	2796	2369
NM_028707	Psd2	3.95898	0.0116646	0.0103418	0	0	1867	1736
NM_028713	Rftn2	3.50739	1.42295	na	0	na	1650	62
NM_028734	Steap2	7.32954	na	na	na	na	8578	1681
NM_028746	Slc7a13	3.00633	2.41322	na	0	na	622	350
NM_028747	Them7	7.79419	na	0.104095	na	0	852	781
NM_028748	Paqr5	3.16768	0.753507	2.86706	0	0.52636	2308	481
NM_028783	Robo4	68.511	12.7762	1.53962	0.859569	2.79497	635	172
NM_028810	Rnd3	3.58144	20.2638	22.7854	0.946574	1.05202	1855	913
NM_028825	Tex37	Inf	na	0.69798	na	0	175	96
NM_028829	Paqr8	6.07814	0.801391	na	1.10468	na	3068	68
NM_028930	Tmc5	10.0227	na	1.03382	na	0.329944	422	245
NM_028943	Sgms2	3.51608	2.41651	0.983425	0.630903	0.910857	4121	369
NM_029007	Fam84a	6.24422	5.21893	12.0869	0.736058	0.358623	2248	2183
NM_029011	Pyroxd2	7.82107	1.04365	3.52767	0.0277423	0.545751	1061	277
NM_029021	Ocstamp	Inf	na	na	na	na	396	317
NM_029163	Usp50	6.78095	3.2788	1.04352	0.688586	0	402	30
NM_029296	1700001c19rik	5.84565	na	0.118849	na	8.0388	828	175
NM_029305	1700003f12rik	Inf	0.146763	na	0	na	101	56
NM_029372	Ccdc172	Inf	na	na	na	na	171	114
NM_029416	Klf17	157.832	2.67776	na	0.330273	na	2448	1293
NM_029426	Brsk2	18.4463	0.169821	na	1.38228	na	1749	782
NM_029499	Ms4a4c	3.8971	1.70633	0.779331	0	0.63293	910	298
NM_029639	Plet1	8.29396	7.53123	16.2828	0	0.0662127	1094	590
NM_029815	Bcas1	5.22211	na	0.112431	na	3.83963	1083	104
NM_029879	Rgs7bp	5.11819	na	2.44196	na	0.00983223	4338	147
NM_029972	Ermn	7.67728	na	0.739666	na	0.280194	2639	794
NM_030061	Spink12	19.6283	2.60097	11.7396	0	0	439	143
NM_030067	Adgrf4	5.63422	5.15618	0.892645	0	0	712	687
NM_030098	Rnase6	5.01055	0.320462	1.32589	0	0.510204	507	388
NM_030554	Rab27b	5.24328	1.33526	5.59095	0.0112583	0.0087407	6057	1527
NM_030598	Rcan2	4.53394	0.830465	1.22714	0.344938	1.02768	2383	85
NM_030599	Klrb1b	9.019	1.02074	na	0.0655025	na	1471	792
NM_030611	Akr1c6	36.243	na	0.399307	na	0	339	209
NM_030687	Slco1a4	11.0618	na	na	na	na	1521	243
NM_030706	Trim2	4.56833	0.0887851	1.14138	0.277597	0.49776	3223	1381
NM_030888	C1qtnf3	14.3372	0.517201	3.19284	0.474988	0.218292	1487	1025
NM_031169	Kcnmb1	6.6914	1.2803	na	0.184173	na	3274	386
NM_031186	Ndst3	26.89	na	na	na	na	2645	566
NM_031194	Slc22a8	91.1921	na	na	na	na	1558	405
NM_031195	Msr1	14.6141	1.69821	na	0.144335	na	2520	390
NM_031197	Slc2a2	3.36481	na	na	na	na	884	555
NM_031378	Gsdmc	23.6832	1.17035	0.410224	0	0	706	594
NM_032397	Kcnn1	3.33497	1.40409	2.57269	0.733399	0.32787	2267	239
NM_033078	Klrk1	24.5517	na	1.81085	na	0.106147	2465	371
NM_033264	Arpp21	3.13819	1.69354	1.18538	0	0	674	506
NM_033373	Krt23	7.80285	13.1017	14.6548	0	0	224	203
NM_052977	Adarb2	9.35303	na	na	na	na	2906	1604
NM_053015	Mlph	7.94915	2.05168	0.909499	0.240202	0.349384	2533	1013
NM_053077	Slc45a2	Inf	0.988583	4.61832	0.199232	0.0661684	1294	372
NM_053108	Glrx	4.0703	20.6581	27.7987	0.897582	0.97577	908	149
NM_053123	Smarca1	4.58422	na	0.0320974	na	0	751	485
NM_053190	S1pr5	6.09617	0.0599561	0.0212626	11.8683	0	1009	690
NM_053247	Lyve1	3.73551	0.0776047	na	0	na	1565	398
NM_054055	Slc13a3	24.1308	na	0.409879	na	1.28366	1385	314
NM_057173	Lmo1	13.6955	2.30841	2.72882	0	0	299	248
NM_080285	Cttnbp2	5.22077	4.59482	5.51281	0.192476	0.142231	894	663
NM_080434	Apoa5	19.2375	0.222543	1.82955	0.792233	0.352427	1185	155
NM_080440	Slc8a3	23.0903	na	0.0483776	na	5.31064	1576	871
NM_080450	Gjc3	17.2771	0.0676786	0.0420023	0	0	2636	2569
NM_080563	Rnf144a	6.11136	2.59696	0.0852758	1.04954	6.97444	3860	104
NM_080639	Timp4	4.75486	22.383	0.771345	0.0862359	0.0887446	670	376
NM_080640	Baalc	15.0038	na	0.270654	na	0	2036	930
NM_080644	Cacng5	3.19093	na	0.287091	na	1.24346	2747	1845
NM_080845	Ftcd	19.8752	1.01337	na	0	na	1026	249
NM_080847	Asb15	Inf	na	na	na	na	2388	36
NM_080853	Slc17a6	5.36933	1.21444	1.25089	0	0.600177	1766	935
NM_130865	Dmbx1	59.2359	na	0.351311	na	1.22179	2832	347
NM_130886	Card14	3.43008	1.63882	3.02958	0.957786	0.600684	634	446
NM_130887	Papln	3.18519	2.16614	na	0	na	375	327
NM_130893	Scrt1	3.50739	na	na	na	na	2539	712
NM_133222	Adgrl4	37.9967	8.12069	0.940025	0.845363	0.732541	1785	879
NM_133353	Oosp1	202.844	1.0282	2.31403	0	0	230	154
NM_133653	Mat1a	4.48773	5.76332	4.78475	0.172745	0.516537	1807	1693
NM_133654	Cd34	3.22146	49.4576	5.99754	1.06411	0.960548	1171	116
NM_133675	Sptssb	16.2479	1.4496	4.87792	0	0.34892	1333	458
NM_133681	Tspan1	6.09863	25.4702	28.8176	0.0281178	0.0134116	1107	378
NM_133690	Atp1b4	28.6437	na	0.0822271	na	11.331	2991	2775
NM_133882	C8b	3.21812	2.77668	0.369268	1.26655	0	388	175
NM_133960	Ces2a	7.69716	5.91736	5.24628	0.157032	0.314064	218	47
NM_134054	Sptssa	3.07759	58.5727	55.6297	0.289869	0.288239	1058	935
NM_134094	Ncald	5.4615	0.0243817	0.216166	0	1.22769	2653	833
NM_134103	Il1rap	3.27636	0.170886	0.757531	0	0	1086	616
NM_134157	Atp6v1b1	19.6504	0.110459	0.0489661	2.93571	0	317	247
NM_134251	Slc12a8	6.67378	2.27468	0.378133	0.0272655	0	1048	316
NM_138684	Wfdc12	12.2504	1.20741	5.88766	0	0	428	163
NM_144511	Ces3b	28.4488	na	1.52341	na	0	329	306
NM_144518	2900011o08rik	5.48281	na	na	na	na	1589	261
NM_144538	Rab3il1	7.49035	8.37607	0.301876	0	0.512821	1047	917
NM_144790	Ankrd33	Inf	na	na	na	na	303	267
NM_144836	Slc17a2	37.7044	na	0.0431869	na	1.2183	1223	458
NM_144850	Rapgef3	6.17968	11.4611	1.91936	1.39931	1.25368	778	594
NM_144903	Aldob	27.5121	13.7572	19.4281	0.221528	0.182237	798	366
NM_145079	Ugt1a6a	6.04189	7.23673	7.89309	0	0	1578	574
NM_145137	Mgl2	28.2839	8.59376	0.683097	0.453124	1.2327	429	190
NM_145142	Chst10	3.78696	1.392	0.99597	0.643698	0.864095	1625	1321
NM_145148	Frmd4b	4.35195	3.79675	2.18657	0.69519	0.599327	1493	1278
NM_145210	Oas1e	451.985	3.33925	2.89402	0	0	612	590
NM_145219	Lgi3	19.8752	1.13982	0.279515	0.747658	0.737201	1290	118
NM_145228	Oas1h	52.7361	8.02678	3.13737	0.134665	0	559	496
NM_145369	Wfdc5	50.8571	0.0321977	2.05533	0	0.030105	1841	540
NM_145383	Rho	3.14455	0.712324	na	0	na	2111	367
NM_145489	Ai661453	3.89569	0.131514	0.816197	0.6904	0	1245	745
NM_145532	Mall	12.8653	2.68725	0.924969	0.631459	0.373292	1471	655
NM_145539	Tm4sf4	50.8571	2.08078	0.586982	0.723255	0.852407	584	222
NM_145602	Ndrg4	6.00723	4.29591	0.188085	0.0689211	0	1787	1557
NM_145741	Gdf10	3.74864	1.70091	0.246765	0.705487	2.15565	769	542
NM_145838	St8sia6	11.6473	3.96929	4.58221	1.18876	1.15886	1884	80
NM_145935	Glyat	30.2025	na	na	na	na	106	69
NM_145976	Tifab	8.54364	0.913072	0.545956	0.535497	0.138952	2482	625
NM_145980	8430408g22rik	4.19539	92.6272	32.6462	0.797827	0.831182	532	176
NM_146010	Tspan8	7.18659	12.1781	16.9668	0	0	497	220
NM_146017	Gabrp	19.818	1.79537	3.5992	0	0	1759	1682
NM_146071	Muc20	103.273	na	na	na	na	541	281
NM_146082	Bc027072	Inf	na	na	na	na	961	579
NM_146086	Pde6a	6.02551	na	na	na	na	1509	575
NM_146095	Rorb	6.03024	na	1.54808	na	0.119157	1312	221
NM_146126	Sord	3.23165	10.6023	6.37962	1.39297	1.21481	1131	487
NM_146140	Tram1l1	3.36125	na	na	na	na	976	569
NM_146187	Ffar2	6.46269	na	1.00254	na	0	764	91
NM_146197	Acsm2	3.66146	na	0.877547	na	0.0112061	4685	592
NM_146214	Tat	Inf	2.05546	1.13567	0.601006	0.241101	915	621
NM_146223	Cplx3	8.98104	na	na	na	na	2245	858
NM_146241	Trhde	78.9162	na	na	na	na	2574	1627
NM_146244	Rps6kl1	3.44283	5.61214	1.97359	0.246628	0.0621779	777	613
NM_148949	Tdpoz1	27.4745	na	0.0931178	na	0.522041	1045	631
NM_152804	Plk2	4.18898	19.1516	39.1367	0.444467	0.30386	619	531
NM_152839	Jchain	19.6224	2.08589	1.7623	0	0	1504	711
NM_153069	Leap2	4.00844	na	na	na	na	232	131
NM_153098	Cd109	3.4145	na	1.02489	na	0.76638	1202	49
NM_153166	Cpne5	6.71286	0.274313	0.319204	0	0	2501	1105
NM_153170	Slc36a2	22.0381	3.59155	1.61001	0	0	876	853
NM_153393	Col23a1	5.30327	na	1.30707	na	0.0601661	3859	1044
NM_153408	Neurl3	3.9636	7.89804	4.16528	0.0495526	0	1758	1700
NM_153413	Dock3	4.24027	na	0.18201	na	1.19926	2569	264
NM_153424	Nphp4	5.99553	2.69066	0.650595	0.203286	0	406	323
NM_153506	Clec2e	5.36454	na	0.0778032	na	0	1590	1407
NM_153508	Clstn3	20.3428	1.04365	0.0385538	0.478022	1.14725	836	381
NM_153543	Aldh1l2	3.29339	0.868876	0.0641948	0.0306033	2.44826	3132	571
NM_153820	Arhgap15	3.37249	2.62638	0.277205	0.918304	1.66375	1139	179
NM_170597	Creg2	11.6913	na	na	na	na	4690	340
NM_172439	Inpp5j	3.14158	1.33185	1.59152	0	0	388	277
NM_172447	Cfap69	8.80744	na	1.16667	na	0	214	36
NM_172514	Tmem71	6.37707	1.72454	na	0	na	1707	1603
NM_172553	Alx1	11.1067	na	0.118645	na	0	1341	1036
NM_172614	Tmem44	3.75149	0.541752	na	0.279443	na	2860	311
NM_172861	Slc7a14	20.6546	0.0820116	0.0632268	0	0	6220	6043
NM_172874	Podn	7.76905	0.0871378	0.0193139	0	0	903	844
NM_172928	Dclk3	26.8084	5.04431	3.93015	0.182556	0.238896	941	448
NM_172938	Scml4	5.50178	na	na	na	na	3038	972
NM_172961	Abat	5.99039	3.57069	0.546468	1.08661	1.71677	2941	946
NM_172994	Ppp2r2c	8.52333	0.0367304	0.792412	1.41419	0.842701	2436	1562
NM_173365	Gpr20	14.4362	na	na	na	na	855	272
NM_173371	H6pd	4.8379	2.35587	4.09485	0.746644	0.598472	2077	1806
NM_173385	Cilp	20.5154	8.09052	6.11583	1.18462	1.06763	228	3
NM_173417	Kcns3	3.58533	na	0.185106	na	2.22295	1019	481
NM_173770	Fam69c	Inf	na	na	na	na	849	825
NM_173772	Neu4	Inf	0.347735	0.0342555	0.12004	0.216072	2914	195
NM_173868	St18	3.63729	na	0.281864	na	1.14294	2340	216
NM_174857	Mamdc2	9.15818	na	1.02876	na	0	1013	874
NM_174876	Impg2	6.39124	na	na	na	na	2961	227
NM_174992	Smagp	5.39477	10.8027	1.09112	0	0	508	485
NM_175020	Prss58	Inf	na	na	na	na	100	76
NM_175188	43160	3.66786	0.868283	0.329919	0	0.252066	3107	1897
NM_175189	Hepacam	8.08369	na	0.242054	na	0.954374	1760	279
NM_175256	Heg1	9.26707	1.96645	0.535388	0	0	1385	1316
NM_175271	Lpar4	3.2151	0.0605317	na	0	na	2575	1137
NM_175276	Fhod3	6.58176	na	2.2443	na	0	508	464
NM_175279	Rassf10	4.30466	1.06544	2.15768	0.635209	0.924451	1738	497
NM_175406	Atp6v0d2	22.2135	na	1.58715	na	0.289592	1381	155
NM_175462	Kcnt1	12.8889	na	0.248458	na	2.48848	2156	203
NM_175475	Cyp26b1	8.70352	na	na	na	na	2853	290
NM_175484	Coro2b	3.60905	na	0.130682	na	4.54514	1790	638
NM_175675	Slc35f6	4.60252	11.6705	4.36089	0.550889	0.435693	1880	270
NM_175692	Snhg11	3.875	1.17683	1.22622	0.169347	0.739681	5207	1790
NM_175731	Acer1	8.39456	na	1.47811	na	0.0155961	1589	716
NM_176950	Defb20	Inf	na	0.272698	na	0	339	127
NM_177039	A530016l24rik	25.4091	0.018395	0.456647	0	0	1864	1013
NM_177083	B430306n03rik	3.97504	0.114211	0.544263	0	0	2326	1341
NM_177084	Slc9a4	3.40888	1.53245	1.34167	0	0	1139	829
NM_177129	Cntn2	14.1757	0.0295719	0.440466	60.1152	0.0192381	6109	3734
NM_177175	Tmem215	3.2151	na	na	na	na	1021	627
NM_177307	Cyp4f39	3.01768	1.49307	0.744607	0	0	841	795
NM_177343	Camk1d	4.71577	1.45674	2.12531	0.886079	0.420473	5526	1112
NM_177406	Cyp4a12a	85.7361	na	3.60559	na	0.141145	813	378
NM_177408	Gabrg2	Inf	0.180975	na	1.40374	na	2121	602
NM_177469	Adgra1	8.43443	0.125474	0.0303393	0	0	1894	762
NM_177566	Arhgef15	5.20262	5.56324	1.27875	0.844189	2.12426	1524	509
NM_177568	Plcb2	5.39416	1.57461	1.14724	0.0626776	0.228811	1482	1252
NM_177584	Btla	5.55336	0.014394	0.663604	81.2887	1.18807	2298	1328
NM_177678	Ablim2	4.40629	2.61168	0.443392	0.334678	0	1560	703
NM_177686	Clec12a	8.049	6.46694	9.81242	0	0.0485576	1241	354
NM_177769	Elmod1	50.1264	1.43895	0.637879	0.784826	1.02027	1262	458
NM_177785	Fam205c	4.95488	na	na	na	na	506	302
NM_177829	Spink10	14.0295	0.13392	0.949856	4.70833	0.588542	401	293
NM_177900	Hapln4	5.71075	0.0288063	1.31954	0	0.991975	2341	1972
NM_177906	Opcml	3.45171	0.0251935	0.279205	0	0.364962	4861	1701
NM_178255	Hapln3	23.7333	na	0.337023	na	0	183	134
NM_178280	Sall3	Inf	0.900637	0.532331	0	1.35891	3099	929
NM_178396	Car12	5.05526	0.263563	3.03775	0.0460808	1.1662	2488	619
NM_178594	Vtcn1	26.7837	na	na	na	na	1625	376
NM_178608	Reep1	5.70925	1.5372	2.22602	0.866168	0.826547	2904	432
NM_178628	Atl1	3.82025	0.65098	0.0250936	0	0	747	691
NM_178631	Ralyl	52.6108	na	na	na	na	1232	921
NM_178669	Clrn3	3.83843	12.1828	8.57128	0.025582	0.0179097	2483	1172
NM_178676	Entpd3	3.23632	1.98104	4.39093	0.623159	0.567075	1784	313
NM_178680	Unc45b	4.30072	6.98975	1.04307	0.137395	0	655	395
NM_178681	Dgkb	19.8752	na	na	na	na	2720	1429
NM_178692	C130074g19rik	3.0702	6.81324	2.06411	0.29349	0.233279	2382	543
NM_178703	Slc6a1	Inf	na	0.770605	na	0.560963	2116	1697
NM_178706	Siglech	3.15665	0.917147	0.508209	0	0.0320908	1351	117
NM_178717	Rxfp3	25.3311	0.400755	0.596646	0.500367	0.834319	2149	1583
NM_178777	Nhlh2	8.88538	na	0.019501	na	0	2431	1656
NM_178779	Rnf152	6.23107	na	na	na	na	7302	846
NM_178785	Rasal3	3.52945	18.6306	0.696151	0.45986	2.58719	419	162
NM_178804	Slit2	3.6714	na	0.213105	na	0	1537	1269
NM_178872	Trim36	3.99063	na	0.178098	na	2.41022	2113	97
NM_178887	Fibcd1	18.6476	0.0264254	0.187428	1.03369	1.03369	3148	2317
NM_178899	Hepacam2	4.99134	5.64297	8.08395	0	0.0214613	824	708
NM_178906	Ai593442	3.43432	0.296277	0.0909266	0.496275	4.6424	4634	1392
NM_181045	Caln1	4.85638	na	0.518688	na	0.676513	1235	260
NM_181390	Mustn1	15.5884	7.2264	0.678374	0	0.494444	580	160
NM_181398	Anks1b	11.0232	0.0274147	0.449655	1.62885	0.0293487	3070	1545
NM_181407	Me3	19.8752	na	na	na	na	2462	66
NM_181853	Trim66	4.3595	na	na	na	na	4974	198
NM_182783	Fam167b	19.8752	4.99705	na	0.0841214	na	250	196
NM_182930	Plekha6	3.66181	1.44388	2.03097	1.44016	0.83172	3727	1511
NM_183064	Fgf12	3.35265	na	2.3647	na	0.0168862	2297	281
NM_183147	Sprn	Inf	na	na	na	na	2586	558
NM_183187	Fam107a	7.26091	1.66182	0.615248	0	1.71621	2412	1135
NM_183190	Ms4a5	Inf	na	na	na	na	331	35
NM_183335	Igsf1	31.1768	na	0.858997	na	0	178	138
NM_197996	Tspan15	7.32689	18.8162	13.3155	0.2447	0.0590154	2617	645
NM_198302	Rbm11	3.60092	na	na	na	na	1925	798
NM_198614	C2cd4c	6.07947	0.0262219	0.0232481	0.224208	0	5198	1337
NM_198649	Ablim3	5.49887	11.6285	0.282457	0.771349	3.41638	1902	171
NM_198864	Slitrk3	5.55336	na	0.0605165	na	0	370	50
NM_199018	Stard8	3.00964	4.88244	0.802909	0.594116	0.660949	1528	1035
NM_199311	Clec4a1	10.9768	na	na	na	na	694	54
NM_201239	Rnase4	4.02098	10.7464	20.8271	1.06628	0.927853	884	155
NM_201531	Kcnf1	7.89162	0.0251796	na	0.389249	na	2601	285
NM_201641	Ugt1a10	6.14789	7.23673	7.89309	0	0	1578	574
NM_201642	Ugt1a7c	6.39516	7.23673	7.89309	0	0	1578	574
NM_201643	Ugt1a5	6.12568	7.23673	7.89309	0	0	1578	574
NM_201644	Ugt1a9	6.21232	7.23673	7.89309	0	0	1578	574
NM_201645	Ugt1a1	5.66417	7.23673	7.89309	0	0	1578	574
NM_207243	Muc19	12.4297	na	na	na	na	177	72
NM_207244	Cd200r4	5.65079	na	1.99824	na	0	719	698
NM_207624	Ace	18.1449	2.86833	1.70997	0.303512	0.367788	930	226
NM_207649	Rcan2	4.58456	0.830465	1.22714	0.344938	1.02768	2383	85
NM_207707	Esr2	41.2118	1.26857	0.478599	0	0.320015	1311	654
NM_213614	43348	5.01445	1.62539	1.7392	2.06718	1.37423	929	348
NR_001592	H19	12.8338	1.25264	0.134616	3.08159	0.81532	2615	598
NR_002873	Vax2os	51.8314	na	na	na	na	1919	1894
NR_003718	Miat	32.2607	0.36319	0.0429335	0.0365444	6.71503	7008	167
NR_015388	Dlx6os1	4.82901	na	na	na	na	4022	379
NR_015459	4933431e20rik	8.176	1.08481	0.665292	0.223283	0.115282	4658	2034
NR_030701	Gm20554	10.4387	0.308903	na	0	na	5099	2278
NR_033214	B430212c06rik	3.11768	0.907976	0.100625	0.356555	0.329128	2208	385
NR_033217	Bc030870	Inf	na	0.044822	na	0	1050	468
NR_033657	Miat	32.2607	0.354863	0.0419491	0.0374019	6.87261	7008	167
na is for genes for which d3'UTR ratios could not be calculated due to the absence of reads mapping to regions upstream of proximal pAs in last exons
